# 1 **Specialized germline P-bodies are required to specify germ cell fate in *C. elegans* embryos**

2

3 **Authors:** Madeline Cassani and Geraldine Seydoux<sup>1</sup>

4 HHMI and Dept. of Molecular Biology and Genetics, Johns Hopkins University School of  
5 Medicine, Baltimore MD USA

6

7 1. Corresponding author: [gseydoux@jhmi.edu](mailto:gseydoux@jhmi.edu)

8

## 9 **ABSTRACT**

10 In animals with germ plasm, specification of the germline involves “germ granules”,  
11 cytoplasmic condensates that enrich maternal transcripts in the germline founder cells. In *C.*  
12 *elegans* embryos, P granules enrich maternal transcripts, but surprisingly P granules are not  
13 essential for germ cell fate specification. Here we describe a second condensate in the *C.*  
14 *elegans* germ plasm. Like canonical P-bodies found in somatic cells, “germline P-bodies” contain  
15 regulators of mRNA decapping and deadenylation and, in addition, the intrinsically-disordered  
16 proteins MEG-1 and MEG-2 and the TIS11-family RNA-binding protein POS-1. Embryos lacking  
17 *meg-1* and *meg-2* do not stabilize P-body components, miss-regulate POS-1 targets, miss-  
18 specify the germline founder cell, and do not develop a germline. Our findings suggest that  
19 specification of the germ line involves at least two distinct condensates that independently  
20 enrich and regulate maternal mRNAs in the germline founder cells.

21

## 22 **Introduction**

23 The germ plasm is a specialized cytoplasm found in the eggs of certain insects,  
24 nematodes and vertebrates that serves as a vehicle to segregate maternal proteins and RNAs to  
25 the nascent embryonic germline (Kulkarni and Extavour, 2017). Germ plasm assembly is a  
26 derived trait that arose independently several times in evolution as an alternative to the  
27 ancestral mode of germ cell fate specification by cell-to-cell signaling (Kemph and Lynch, 2022).  
28 A convergent characteristic of germ plasm in both vertebrate and invertebrate species is the  
29 presence of “germ granules”, micron-size ribonucleoprotein assemblies that contain RNAs

30 coding for factors that promote germ cell development (Kulkarni and Extavour, 2017). Germ  
31 granules segregate with the germ plasm to the germline founder cells and are thought to  
32 contribute to their specification as primordial germ cells (“PGCs”). Germ granules were initially  
33 described using electron microscopy as mostly amorphous, electron-dense, micron-sized  
34 structures not surrounded by membranes (Arkov and Ramos, 2010). Fluorescence microscopy  
35 studies and proteomics in *Drosophila*, zebrafish, *Xenopus*, *C. elegans* and mice have revealed  
36 the presence of different types of condensates in germ cells, some with complex sub-structure  
37 (Gallo et al., 2008; Wang et al., 2014; Vo et al., 2019; Eichler et al., 2020; Wan et al., 2018;  
38 Uebel et al., 2020; Uebel et al., 2021; Roovers et al., 2018; Neil et al., 2021; Yang et al., 2022;  
39 Aravin et al., 2009). These studies have hinted that germ cells contain multiple condensates  
40 that compartmentalize different RNA-centered activities that collectively specify germ cell fate.  
41 For example, polar granules and founder granules are distinct granules in the germ plasm of  
42 *Drosophila melanogaster* that harbor mRNAs that need to be translated (polar granules) or  
43 degraded (founder granules) for proper germline development (Eichler et al., 2020). Here we  
44 demonstrate that the *C. elegans* germ plasm also contains two condensate types that make  
45 distinct contributions towards germ cell fate.

46         The first condensates to be described in the *C. elegans* germ plasm were named P  
47 granules for their segregation with P (posterior) blastomeres through a series of 4 asymmetric  
48 divisions that eventually give rise to the germline founder cell P<sub>4</sub> (Strome and Wood, 1982; Fig.  
49 1E). P granules are scaffolded by the nematode-specific, RGG-domain proteins PGL-1 and PGL-3,  
50 which form dense liquid-like condensates *in vitro* and *in vivo* (Brangwynne et al., 2009;  
51 Hanazawa et al., 2011; Updike et al., 2011; Saha et al., 2016; Putnam et al., 2019). In zygotes,  
52 the PGL condensates become covered on their surface by nanoscale solid clusters assembled by  
53 a pair of paralogous and redundant intrinsically-disordered proteins MEG-3 and MEG-4. MEG-  
54 3/4 form an essential protective layer that controls the dynamics and asymmetric segregation  
55 of PGL condensates into the P blastomeres in part by reducing the surface tension of PGL  
56 condensates (Folkmann and Putnam, et al., 2021). MEG-3/4 also recruit maternal mRNAs to P  
57 granules. MEG-3 binds RNA *in vitro* and co-precipitates with ~500 maternal mRNAs in  
58 embryonic lysates, including the Nanos homologue *nos-2* and the predicted E3 ubiquitin ligase

59 *Y51F10.2* that are required redundantly for fertility (Lee et al., 2020). Incorporation into P  
60 granules enriches RNAs in the P<sub>4</sub> blastomere as much as 5-fold over what would have been  
61 achieved by equal segregation to all embryonic cells (Schmidt et al., 2021). *nos-2* and *Y51F10.2*  
62 are translationally repressed in the P<sub>0</sub> to P<sub>3</sub> blastomeres and become translationally activated in  
63 P<sub>4</sub>, the germline founder cell (Subramaniam and Seydoux, 1999; Lee et al., 2020). Despite their  
64 role in enriching mRNAs required for germ cell development, P granules are not essential for  
65 germ cell fate. In *meg-3 meg-4* mutants, the germline founder cell P<sub>4</sub> inherits no PGL  
66 condensates and reduced levels of *nos-2* and *Y51F10.2* transcripts (Lee et al., 2020; Schmidt et  
67 al., 2021). These transcripts, however, are still translationally activated in P<sub>4</sub>, and *meg-3 meg-4*  
68 animals are mostly (~70%) fertile (Lee et al., 2020). These observations indicate that the *C.*  
69 *elegans* germ plasm maintains proper regulation of maternal mRNAs in the absence of P  
70 granules.

71         The *C. elegans* germ plasm contains a second condensate type that contains proteins  
72 characteristic of P-bodies, ubiquitous RNP granules implicated in mRNA storage and decay  
73 (Gallo et al., 2008; Ivanov et al., 2019). P-body-like condensates associate with P granules in  
74 germ plasm in tight assemblies containing a central P granule surrounded by several P-body-like  
75 condensates (Gallo et al., 2008). Dozens of proteins have been reported to enrich in granules in  
76 the *C. elegans* germ plasm (Updike and Strome, 2010; Phillips and Updike, 2022), and, in most  
77 cases, it is not known whether these localize to P granules proper (as defined by PGL-3 and  
78 MEG-3) or to the closely apposed P-body-like condensates described in Gallo et al. 2008, or to  
79 both. In particular, MEG-1 and MEG-2 are two intrinsically-disordered proteins, distantly  
80 related to MEG-3 and MEG-4, and originally described as P granule proteins (Leacock and  
81 Reinke, 2008). In this study, we demonstrate that MEG-1 and MEG-2 associate with canonical P-  
82 body proteins and stabilize P-body-like condensates in P<sub>4</sub>. Our findings indicate that, unlike P  
83 granules, “germline P-bodies” are essential for maternal mRNA regulation and specification of  
84 P<sub>4</sub> as the germline founder cell.

85

86 **Results**

87

88 *MEG-1 enriches in puncta distinct from P granules*

89 To characterize the localization of MEG-1, we used a MEG-1::GFP fusion where GFP is  
90 inserted at the C-terminus of the MEG-1 ORF in the *meg-1* locus. Consistent with a previous  
91 report that used a polyclonal antibody raised against MEG-1 (Leacock and Reinke, 2008), MEG-  
92 1::GFP segregated with germ plasm in early embryos, distributing between a cytoplasmic pool  
93 and bright puncta in P blastomeres that overlapped with P granules (Fig. 1A). High resolution  
94 images revealed that the MEG-1 puncta localize to the periphery of P granules (visualized with  
95 PGL-3 or MEG-3) in P<sub>1</sub> blastomeres (Fig. 1C,D, Fig. S1A). By the P<sub>4</sub> stage, when P granules are  
96 fully perinuclear, the MEG-1::GFP signal was distributed throughout P granules (Fig. 1C,D, Fig.  
97 S1A). In Z2 and Z3, MEG-1::GFP dispersed back into the cytoplasm (Fig. S1B) and turned over by  
98 mid-embryogenesis (Leacock and Reinke, 2008).

99 Leacock and Reinke, 2008 reported that MEG-1 enrichment in P blastomeres is  
100 independent of P granule components and vice versa. Consistent with these results, we found  
101 that MEG-1 still enriched preferentially in P blastomeres in *meg-3(ax3055) meg-4(ax3052)*  
102 mutants (Fig. 1B). MEG-1 puncta, however, remained cytoplasmic and did not associate with  
103 the nuclear envelope in P<sub>4</sub> of *meg-3(ax3055) meg-4(ax3052)* mutants (Fig. 1A-B). Leacock and  
104 Reinke, 2008 used a partial deletion of the *meg-1* locus and RNAi of the *meg-1* paralog *meg-2* to  
105 generate embryos depleted of both *meg-1* and *meg-2*. To complement these analyses, we  
106 created a deletion that removed the entire *meg-1 meg-2* operon. *meg-1 meg-2(ax4532)*  
107 hermaphrodites were 100% maternal effect sterile as reported for *meg-1(vr10) meg-2(RNAi)*  
108 (Table S1). We found that MEG-3 and PGL-3 still assembled into puncta that segregated with P  
109 blastomeres in *meg-1 meg-2(ax4532)* embryos, confirming that P granule assembly does not  
110 require *meg-1* and *meg-2* (Fig. S1C). We noticed, however, that P granule enrichment in P  
111 blastomeres was not as robust in *meg-1 meg-2* embryos (Fig. S1D) as previously reported  
112 (Leacock and Reinke, 2008; Wang et al., 2014), suggesting a minor contribution of MEG-1/2 to P  
113 granule segregation.

114 We conclude that MEG-1 localizes to assemblies that are distinct from P granules. MEG-  
115 1 puncta and P granules interact but assemble independently in the cytoplasm of P  
116 blastomeres.

117

118 *MEG-1 immunoprecipitates with P-body components and several RNA-binding proteins,*  
119 *including POS-1*

120 As we show here for MEG-1, we previously reported that P-body markers enrich at the  
121 periphery of P granules in early P blastomeres (Gallo et al., 2008). Furthermore, Wu et al., 2017  
122 identified MEG-1 and MEG-2 among immunoprecipitates of the P-body scaffold C-NOT1<sup>N<sup>TL</sup>-1</sup> and  
123 identified seven CCR4-NOT subunits in MEG-2 immunoprecipitates. To complement these  
124 studies, we performed mass spectrometry on MEG-1::GFP immunoprecipitated from early  
125 embryo lysates using anti-GFP antibodies. As controls, we used lysates from wild-type worms  
126 expressing untagged MEG-1. We identified 54 proteins that were enriched at least twofold over  
127 untagged controls in two biological replicates (Fig. 2A, Table S2).

128 Among the proteins in MEG-1::GFP immunoprecipitates, we observed an enrichment for  
129 canonical P-body proteins (7 out of 36 canonical P-body proteins in the *C. elegans*  
130 genome/WormBase,  $p < 0.0001$ , Fisher's exact test), including the decapping factors DCP2<sup>DCAP-2</sup>  
131 and EDC4<sup>EDC-4</sup>, the TRIM-NHL family member and miRISC cofactor TRIM45<sup>NHL-2</sup>, the CCR4-NOT  
132 complex subunits CNOT1<sup>N<sup>TL</sup>-1</sup>, CNOT2<sup>TAG-153</sup>, CNOT3<sup>N<sup>TL</sup>-3</sup> and the translational repressor and  
133 DDX6-binding partner eIF4-ET<sup>IFET-1</sup> (Table S2). In addition to P-body proteins, we also observed  
134 eight RNA-binding proteins including the translational repressor GLD-1, the poly-A polymerase  
135 GLD-2/GLD-3, the zinc finger proteins MEX-1, OMA-1 and POS-1, the KH domain protein MEX-3,  
136 and the RRM domain protein SPN-4. All of these have been reported to regulate maternal  
137 mRNAs and to enrich in germ plasm and "P granules" (because P-bodies and P granules are  
138 closely linked in wild-type embryos, most studies have not distinguished between the two).  
139 Among these, POS-1 scored as one of the most highly enriched proteins in MEG-1::GFP  
140 precipitates after MEG-1 and MEG-2 (Fig. 2A, Table S2).

141 POS-1 regulates the poly-adenylation of thousands of maternal mRNAs containing AU-  
142 rich elements (AREs) in their 3' UTR (Farley et al., 2008; Elewa et al., 2015). ARE-binding proteins  
143 have been reported to recruit P-body components, including decapping enzymes and the  
144 deadenylation machinery (Ciais et al., 2013). To confirm the interaction between POS-1 and  
145 MEG-1, we probed the MEG-1::GFP immunoprecipitates with a polyclonal serum against POS-1

146 (Barbee and Evans, 2006) (Fig. 2B). This experiment confirmed that MEG-1::GFP precipitates  
147 contain POS-1, but not the control protein tubulin (Fig. 2B and Fig. S2A,B). POS-1 was not  
148 immunoprecipitated by a MEG-3::GFP fusion, further confirming the specificity of the MEG-1-  
149 POS-1 interaction (Fig. 2C and Fig. S2C,D). We conclude that MEG-1 exists in a complex that  
150 contains P-body components and RNA-binding proteins, including POS-1, a protein predicted to  
151 recruit P-body proteins to maternal mRNAs.

152

### 153 *MEG-1 and POS-1 co-localize in P-body-like puncta in P<sub>4</sub>*

154 To examine the distribution of POS-1 and P-body components relative to MEG-1 and P  
155 granules, we used antibodies against POS-1 (Barbee and Evans, 2006) and P-body marker  
156 DDX6<sup>CGH-1</sup> (Alessi et al., 2015) and a mNeonGreen::3xFLAG fusion to P-body marker EDC-3  
157 (abbreviated mNG::EDC-3, DeMott et al., 2021). In P<sub>1</sub> blastomeres, POS-1, DDX6<sup>CGH-1</sup> and EDC-3  
158 enriched in condensates at the periphery of PGL-3 puncta (Fig. S3A). The POS-1, DDX6<sup>CGH-1</sup> and  
159 EDC-3 condensates overlapped but were not perfectly coincident with MEG-1 (Fig. S3B). In P<sub>4</sub>,  
160 MEG-1, POS-1, DDX6<sup>CGH-1</sup> and EDC-3 appeared to mix more extensively with each other and  
161 PGL-3 (Fig. S3A,B). We reasoned that if P-body components associate with MEG-1, they might  
162 still form condensates in the absence of P granules. As expected, we found that in *meg-3 meg-4*  
163 embryos, which lack P granules, POS-1, DDX6<sup>CGH-1</sup> and EDC-3 enriched in cytoplasmic puncta  
164 most prominently in P<sub>4</sub>, and these co-localized with MEG-1 (Fig. 3A).

165 *C. elegans* mRNAs can be detected using an oligo-dT probe that detects poly-adenylated  
166 mRNAs and a probe against SL1, the splice leader found on the 5' end of ~60% of *C. elegans*  
167 mRNAs (Seydoux and Fire, 1994). Consistent with enriching maternal mRNAs, P granules are  
168 positive for both SL1 and poly-A (Seydoux and Fire, 1994). We reasoned that, since P-bodies are  
169 thought to enrich deadenylated mRNAs (Ivanov et al., 2019), P-bodies might be positive for SL1  
170 but not poly-A. P-bodies also assemble in somatic blastomeres, becoming most prominent at  
171 the 4-cell stage when degradation of maternal mRNAs begins in somatic lineages (Gallo et al.,  
172 2008). Consistent with harboring deadenylated mRNAs, somatic P-bodies marked by EDC-3  
173 showed a high SL1 signal but no poly-A enrichment (compared to the surrounding cytoplasm,  
174 Fig. S3C). Similarly, we found that MEG-1::GFP puncta in P<sub>4</sub> of *meg-3 meg-4* embryos were

175 positive for SL1 but not poly-A (Fig. 3B). Interestingly, MEG-1::GFP puncta in P<sub>3</sub> were positive for  
176 both SL1 and poly-A (Fig. 3B), suggesting that at this stage MEG-1 puncta do not yet correspond  
177 to mature P-body-like structures.

178 Taken together, these observations suggest that, in early P blastomeres, MEG-1 and P-  
179 body proteins form overlapping, but not perfectly coincident, assemblies at the periphery of P  
180 granules. In P<sub>4</sub>, MEG-1 and P-body components come together into condensates that contain  
181 deadenylated mRNAs. We refer to these P<sub>4</sub>-specific condensates as “germline P-bodies” to  
182 distinguish these from somatic P-bodies which form in somatic blastomeres and do not contain  
183 MEG-1 or POS-1.

184

185 *meg-1 and meg-2 are required to maintain DDX6<sup>CGH-1</sup> and EDC-3 and assemble robust germline*  
186 *P-bodies in P<sub>4</sub>.*

187 Unlike P granule proteins, such as PGL-3, which are asymmetrically segregated from the  
188 zygote stage (Fig. S1D), DDX6<sup>CGH-1</sup> and EDC-3 are inherited by all blastomeres during early  
189 cleavages. After the 8-cell stage, DDX6<sup>CGH-1</sup> is turned over in somatic blastomeres (Boag et al.,  
190 2005) and remains at high levels only in P<sub>4</sub> (Fig. S4A-C). EDC-3 is maintained in somatic  
191 blastomeres throughout embryogenesis but enriches in P<sub>4</sub> (Fig. S4D-F). In *meg-1 meg-2*  
192 mutants, DDX6<sup>CGH-1</sup> and EDC-3 distributions were unchanged through the 8-cell stage, but  
193 DDX6<sup>CGH-1</sup> was not maintained, and EDC-3 was not enriched, in P<sub>4</sub> (Fig. S4). In contrast, POS-1,  
194 which enriches with germ plasm from the zygote stage (Han et al., 2018), was not affected in  
195 *meg-1 meg-2* (Fig. 4A). To quantify these observations, we compared the levels in P<sub>4</sub> of  
196 DDX6<sup>CGH-1</sup>, EDC-3 and POS-1 in *meg-1 meg-2*, *meg-3 meg-4*, and embryos depleted of all four  
197 MEG proteins [*meg-1(vr10) meg-2(RNAi) meg-3(tm4259) meg-4(RNAi)* embryos] (Fig. 4A).  
198 DDX6<sup>CGH-1</sup> and EDC-3 levels were significantly reduced in P<sub>4</sub> of *meg-1 meg-2* embryos compared  
199 to wild-type and in *meg-1 meg-2 meg-3 meg-4* embryos compared to *meg-3 meg-4* embryos  
200 (Fig. 4A,B). In contrast, POS-1 levels were not significantly affected in either *meg-1 meg-2* or  
201 *meg-3 meg-4* mutants and were reduced only in the quadruple mutant. We conclude that MEG-  
202 1/2 are essential to maintain high levels of DDX6<sup>CGH-1</sup> and EDC-3 in P<sub>4</sub> and are required  
203 redundantly with MEG-3/4 to maintain high levels of POS-1 in P<sub>4</sub>.

204           The reduction in DDX6<sup>CGH-1</sup> and EDC-3 levels in P<sub>4</sub> suggests that germline P-body activity  
205 might be compromised in *meg-1 meg-2* mutants. Consistent with this hypothesis, *in situ*  
206 hybridization against poly-A and SL1 revealed that poly-A levels were higher in P<sub>4</sub> of *meg-1*  
207 *meg-2* embryos compared to wild-type and in *meg-1 meg-2 meg-3 meg-4* embryos compared  
208 to *meg-3 meg-4* embryos, despite either a reduction or no significant change in SL1 levels (Fig.  
209 4C,D). We observed SL1+ puncta in P<sub>4</sub> in 14/17 of *meg-3 meg-4* embryos and in 4/20 *meg-1*  
210 *meg-2 meg-3 meg-4* embryos (Fig. S5A). The SL1+ puncta did not enrich poly-A over the  
211 cytoplasm in *meg-3 meg-4* embryos but did in *meg-1 meg-2 meg-3 meg-4* embryos (Fig. S5A).  
212 Together these observations indicate that MEG-1 and MEG-2 are required to maintain robust  
213 levels of P-body proteins and robust activation of mRNA deadenylation in P<sub>4</sub>.

214  
215 *meg-1 meg-2* embryos fail to turnover transcripts targeted for deadenylation by POS-1

216           To examine directly whether *meg-1 meg-2* mutants exhibit defects in maternal mRNA  
217 regulation, we performed RNAseq to compare the transcriptomes of *meg-1 meg-2* mutant  
218 embryos to that of wild-type. Two independent RNA-seq libraries were analyzed for each  
219 genotype (wild type and *meg-1(vr10) meg-2(RNAi)*). This analysis identified 550 upregulated  
220 mRNAs, and 230 downregulated mRNAs, in *meg-1 meg-2* embryos compared to wild-type ( $\pm 1.5$   
221 fold change,  $p < 0.05$ ; Fig. 5A, Table S3).

222           Elewa et al., 2015 identified 3,726 transcripts that display longer poly-A tails in *pos-*  
223 *1(RNAi)* embryos compared to wild-type (“deadenylated POS-1 targets”), of which 3,718 were  
224 detected in our RNA-seq. 40% of genes (223/550) upregulated in *meg-1 meg-2* embryos were  
225 among these deadenylated POS-1 targets (Fig. 5B, Table S3). Assuming a total pool of 11,121  
226 transcripts that can be detected by these analyses in early embryos (see Methods), we found  
227 this overlap to be significant (Fisher’s exact test,  $p$ -value=0.0002). In comparison, the overlap  
228 between transcripts downregulated in *meg-1 meg-2* embryos and deadenylated POS-1 targets  
229 (30/3,718 transcripts;  $p$ -value = 1) or adenylated POS-1 targets (transcripts with shorter poly-A  
230 tails in *pos-1(RNAi)*; 17/1,307;  $p$ -value=0.99) was not significant (but see next section). We  
231 conclude that MEG-1 and MEG-2 contribute to the turn-over of a subset of maternal mRNAs  
232 also targeted by POS-1 for deadenylation.



233 *neg-1* and *cdc-25.3* are two transcripts among the 223 potential targets shared between  
234 POS-1 and MEG-1. *neg-1* and *cdc-25.3* are maternally-deposited and turned over in all lineages  
235 by the 28-cell stage (Fig. S6A,B; Tintori et al., 2016; Elewa et al., 2015). In *meg-1 meg-2*  
236 embryos, but not in *meg-3 meg-4* embryos, *neg-1* and *cdc-25.3* transcripts were still detected in  
237 P<sub>4</sub> in the 28-cell stage (Fig. 5C-F and Fig. S6C,D). These observations confirm that *meg-1/2*  
238 activity is required for the efficient turnover of a subset of POS-1-regulated transcripts.

239  
240 *meg-1 meg-2* embryos fail to express efficiently transcripts activated by POS-1 for translation in  
241 P<sub>4</sub>

242 In addition to promoting deadenylation of a subset of maternal transcripts, POS-1 is also  
243 required to extend the poly-A tail of a different group of maternal transcripts that are  
244 translationally activated in embryos, including *nos-2*, *Y51F10.2* and *xnd-1* (Elewa et al., 2015).  
245 These transcripts code for factors required for germ cell fate and are translationally repressed  
246 in the P<sub>0</sub>, P<sub>1</sub>, P<sub>2</sub> and P<sub>3</sub> blastomeres and translationally activated in P<sub>4</sub> (Lee et al. 2020; Mainpal  
247 et al., 2015). Translational activation of *nos-2* and *Y51F10.2* has been confirmed to require POS-  
248 1 (D'Agostino et al., 2006; Jadhav et al., 2008; Lee et al., 2020).

249 We used *in situ* hybridization and immunofluorescence to examine transcript and  
250 protein levels in P<sub>4</sub> of wild type, *meg-1 meg-2*, *meg-3 meg-4* and *meg1 meg-2 meg-3 meg-4*  
251 embryos (Fig. 6). We found that for all three transcripts, RNA levels were lowest in the *meg-3*  
252 *meg-4* mutants, consistent with a dependence on P granules for enrichment in P<sub>4</sub>. RNA levels  
253 were also reduced in *meg-1 meg-2* mutants compared to wild-type, suggesting that MEG-1/2  
254 also contribute to RNA enrichment either directly or indirectly through an effect on P granule  
255 segregation, since P granules are also inefficiently segregated in these mutants (Fig. S1D).  
256 Adjusting for RNA levels, we found that protein output was reduced in *meg-1 meg-2* and  
257 elevated in *meg-3 meg-4* compared to wild-type (Fig. 6). These differences did not correlate  
258 with POS-1 protein levels in P<sub>4</sub>, which were similar in these mutants (Fig. 4 A,B). Consistent with  
259 *meg-1 meg-2* and *meg-3 meg-4* acting in parallel, protein levels were lowest in embryos  
260 depleted of all four *megs* compared to either double combination. Together, these  
261 observations suggest that *meg-1 meg-2* and *meg-3 meg-4* contribute independently to

262 expression of maternal transcripts in P<sub>4</sub>, with MEG-3/4 acting primarily by boosting RNA levels  
263 and MEG-1/2 primarily by boosting protein output.

264 In wild type, *nos-2* and *Y51F10.2* RNAs enrich in P granules through P<sub>3</sub> and become  
265 cytoplasmic in P<sub>4</sub> coincident with translational activation (Lee et al., 2020). [*xnd-1* is a much less  
266 abundant transcript which precluded us from evaluating its partitioning between P granules  
267 and the cytoplasm (Fig. 6E)]. Consistent with reduced translational activation in P<sub>4</sub>, we observed  
268 that *nos-2* and *Y51F10.2* remained enriched in a perinuclear pattern in *meg-1 meg-2* embryos,  
269 as also observed in *pos-1* embryos (Lee et al., 2020) (Fig. 6A,C, Fig. S7). As mentioned above,  
270 *nos-2* and *Y51F10.2* exhibited a higher protein output in P<sub>4</sub> in *meg-3 meg-4* embryos compared  
271 to wild-type and *meg-1 meg-2* embryos (Fig. 6B and 6D), suggesting that assembly into P  
272 granules dampens translational activation. We could not determine translational output in  
273 *meg-1 meg-2 meg-3 meg-4* due to the extremely low levels of RNA in P<sub>4</sub> in these mutants. We  
274 conclude that *meg-1 meg-2* are required for maximal translation activation of POS-1 targets in  
275 P<sub>4</sub>, which is antagonized by *meg-3 meg-4*.

276

277 *Primordial germ cells adopt a muscle precursor-like cell fate in meg-1 meg-2 mutants*

278 In *pos-1* mutants, P<sub>4</sub> descendants develop as muscle precursor cells that express the  
279 myoD homolog *hlh-1* (Tabara et al., 1999). To determine whether a similar cell fate  
280 transformation occurs in *meg-1 meg-2* mutants, we examined the expression of *hlh-1* and the  
281 PGC zygotic transcript *xnd-1* (Mainpal et al., 2015) by *in situ* hybridization using a P granule  
282 marker to identify P<sub>4</sub> descendants. We observed *hlh-1* transcripts in P<sub>4</sub> descendants in 21/23  
283 bean to comma stage *meg-1 meg-2* embryos examined, compared to 0/21 wild-type embryos  
284 examined (Fig. 7A). In contrast, we failed to observe robust expression of *xnd-1* in 16/24 *meg-1*  
285 *meg-2* embryos (Fig. 7B).

286 In wild type, the daughters of P<sub>4</sub> (Z2 and Z3) remain non-proliferative during  
287 embryogenesis and only divide in L1 larvae after the onset of feeding. In *meg-1 meg-2* mutants,  
288 we observed more than two P granule-positive cells in 50% of bean-to-comma cell stage  
289 embryos (Fig. 7C) and in 100% of non-fed L1 larvae stage (Fig. 7D). The extra P granule-positive  
290 cells were not due to miss-segregation of P granules to the D blastomere (Fig. S8A), were first

291 detected around the 35-45 cell stage (Fig. S8B) and did not express muscle myosin (Fig. S8C).  
292 We conclude that primordial germ cells are partially transformed to muscle precursor-like fate  
293 in *meg-1 meg-2* mutants.

294 The *meg-1 meg-2* phenotype contrasts with that of *meg-3 meg-4* embryos where Z2 and  
295 Z3 express *xnd-1*, do not express *hlh-1* and do not proliferate prematurely despite the absence  
296 of maternal P granules (Fig. 7A,B; Wang et al., 2014). ~70% of *meg-3 meg-4* mutants are fertile,  
297 in contrast to *meg-1 meg-2* mutants which are 100% sterile (Leacock and Reinke et al., 2008;  
298 Wang et al., 2014).

299

## 300 Discussion

301 In this study, we demonstrate that the germ plasm of *C. elegans* contains two  
302 condensate types, P granules and germline P-bodies. Each rely on a different pair of  
303 intrinsically-disordered proteins for efficient accumulation in the germline founder cell P<sub>4</sub>: P  
304 granules depend on MEG-3 and MEG-4 and germline P-bodies depend on MEG-1 and MEG-2.  
305 We used these distinct genetic requirements to distinguish the contribution of each condensate  
306 to germ cell fate (Fig. 7E). P granules enrich regulators of small RNA homeostasis (Ouyang et al.,  
307 2019) and maternal mRNAs but are not required for maternal mRNA regulation (Lee et al, 2020  
308 and this study). mRNA regulation depends on “germline P-bodies”, which promote the  
309 translation of mRNAs coding for germline determinants and the turn-over of mRNAs coding for  
310 somatic determinants. We propose that the germ cell fate-specifying “germ granules” of *C.*  
311 *elegans* are assemblies of at least two distinct condensates, P granules and germline P-bodies,  
312 which enrich and regulate, respectively, maternal mRNAs in the germline founder cells.

313

314 *Germline P-bodies and P granules are two types of condensates that require MEG proteins for*  
315 *stabilization in the embryonic germ lineage*

316 P granules were the first characterized condensates in the *C. elegans* germ plasm  
317 (Strome and Wood, 1982). P granules consist of a dense liquid core, assembled by PGL proteins,  
318 surrounded by interfacial nanoscale, RNA-rich solid clusters assembled by intrinsically-  
319 disordered proteins MEG-3 and MEG-4 (Folkmann and Putnam et al., 2021). In this study, we

320 describe a second condensate type, germline P-bodies, that contains regulators of mRNA  
321 adenylation and decapping, the RNA-binding protein POS-1, and MEG-1 and MEG-2, two  
322 intrinsically-disordered proteins related to MEG-3 and MEG-4. Germline P-body components  
323 assemble in complex patterns around P granules in early P blastomeres and merge with each  
324 other and P granules in P<sub>4</sub>. In embryos lacking P granules (*meg-3 meg-4* mutants), germline P-  
325 bodies can be visualized in P<sub>4</sub> as discrete SL1+ poly-A- cytoplasmic puncta that are also positive  
326 for MEG-1, POS-1 and the canonical P-body markers DDX6<sup>CGH-1</sup> and EDC-3. In the absence of  
327 *meg-1 meg-2*, DDX6<sup>CGH-1</sup> and EDC-3 levels are reduced and maternal mRNA regulation fails,  
328 despite normal P granule assembly and POS-1 levels (Fig. 7E).

329         How MEG-1/2 stabilize germline P-body components remains unclear. Unlike MEG-3/4  
330 which are required for the asymmetric segregation of P granules from the zygote stage onward,  
331 MEG-1/2 do not appear to affect the distribution of germline P-body components until after the  
332 8-cell stage. P-body components (DDX6<sup>CGH-1</sup> and EDC-3) are initially segregated to all cells and  
333 coalesce into puncta in somatic cells coincident with the onset of maternal mRNA degradation  
334 (Gallo et al., 2008). MEG-1/2 do not affect P-body assembly in somatic cells but are required for  
335 stabilization of DDX6<sup>CGH-1</sup> and EDC-3 specifically in P<sub>4</sub>, at the embryonic stage when DDX6<sup>CGH-1</sup> is  
336 rapidly cleared from somatic lineages. In *Drosophila* embryos, the DDX6/4-ET-like complex  
337 (ME31B/Cup) is targeted for degradation by CTLH, an E3 ubiquitin ligase, and Marie Kondo, an  
338 E2 conjugating enzyme (Cao et al., 2020; Zavortink et al., 2020). It will be interesting to  
339 determine whether homologs of these factors promote DDX6<sup>CGH-1</sup> turnover in *C. elegans* and  
340 how MEG-1/2 might oppose these activities in P<sub>4</sub>.

341         In contrast to somatic blastomeres which activate zygotic transcription by the 4-cell  
342 stage, P blastomeres remain transcriptionally silent until the birth of the daughters of P<sub>4</sub>, the  
343 primordial germ cells Z2 and Z3 (100-cell stage). We suggest that MEG-enhanced condensation  
344 of P granules and germline P-bodies serves as a mechanism to concentrate maternally-provided  
345 mRNAs and their regulators in germ plasma to ensure that P<sub>4</sub> inherits sufficient machinery to  
346 initiate the maternal-to-zygotic transition. The MEG-1/2 and MEG-3/4 paralog pairs appear to  
347 have diverged such that MEG-1/2 interact preferentially with P-body components and MEG-3/4  
348 interact preferentially with P granule components. MEG-3/4, but not MEG-1/2, contain an

349 HMG-like domain essential for MEG-3/4 clusters to associate with the surface of PGL  
350 condensates (Schmidt et al., 2021). MEG-3/4 stabilize PGL condensates by lowering their  
351 surface tension (Folkmann and Putnam et al., 2021); it remains to be determined whether  
352 MEG-1/2 function similarly or by another mechanism.

353

354 *Germline P-body proteins control maternal mRNA regulation in the germline founder cell P<sub>4</sub>*

355 The birth of the P<sub>4</sub> blastomere appears to coincide with a major transition in maternal  
356 mRNA regulation in the P lineage as evidenced by 1) coalescence of germline P-bodies  
357 containing deadenylated mRNAs, 2) degradation of transcripts coding for somatic factors, and  
358 3) translation of transcripts coding for germ cell fate determinants. We suggest that regulators  
359 of mRNA adenylation and decapping that enrich in P-bodies drive this transition in P<sub>4</sub> by  
360 targeting maternal mRNAs for de-adenylation/degradation or adenylation/translation,  
361 depending on the combination of RNA-binding proteins, including POS-1, bound to 3' UTRs. The  
362 poly-A polymerase subunits GLD-2 and GLD-3 are enriched in MEG-1 immunoprecipitates and  
363 have been reported to enrich in granules in germ plasm (Wang et al., 2002; Eckmann et al.,  
364 2002). It will be interesting to determine whether GLD-2/3 also localize to germline P-bodies  
365 and are responsible for the translational activation of transcripts like *nos-2*, *Y51F10.2* and *xnd-1*.

366 The birth of P<sub>4</sub> also coincides with the apparent mixing of germline P-bodies and P  
367 granules and the release of *nos-2* and *Y51F10.2* mRNAs from P granules coincident with their  
368 translational activation. This is also the stage where Z granules and SIMR-1 foci appear to de-  
369 mix from P granules to form the multi-condensate nuage characteristic of pre-gametic germ  
370 cells (Wan et al., 2018; Uebel et al., 2021). These observations suggest a dramatic switch in the  
371 material properties of condensates in the transition from P<sub>3</sub> to P<sub>4</sub>. We do not know whether  
372 these changes arise as a cause, or consequence, of the changes in mRNA regulation that also  
373 occur at this stage. In principle, segregation of maternal mRNAs and their regulators into  
374 distinct condensates that eventually merge in P<sub>4</sub> could be used as a physical mechanism to  
375 control RNA-protein interactions. Alternatively, changes in condensation patterns could derive  
376 from changes in the composition and solubility of complexes dispersed throughout the  
377 cytoplasm. We favor the latter since 1) RNAs and proteins enriched in P granules and P-bodies

378 are also found dispersed throughout the cytoplasm and 2) failure to assemble P granules does  
379 not prevent timely translational regulation of mRNAs enriched in P granules. We suggest that  
380 the complex condensation patterns of germline P-body components in early P blastomeres, and  
381 apparent “mixing” with P granules in P<sub>4</sub>, are mesoscale manifestations of molecular-scale  
382 rearrangements that occur throughout the cytoplasm and eventually culminate in the targeting  
383 of the P-body machinery onto maternal mRNAs in P<sub>4</sub>. What regulates these changes during  
384 developmental time remains a mystery. The significance of the close association of germline P-  
385 bodies with P granules is also unclear and may reflect the fact that the two condensate types  
386 likely share some components such as POS-1, which depends on both MEG-1/2 and MEG-3/4  
387 for maximal segregation to P<sub>4</sub> (Fig. 4B).

388

### 389 *A conserved role for P-body proteins in specifying germ cell fate*

390 In *meg-1 meg-2* mutants, P<sub>4</sub> descendants divide precociously, fail to activate the  
391 transcription of the germ cell transcript *xnd-1* and activate instead the transcription of the  
392 muscle transcription factor MyoD<sup>HLH-1</sup>. These observations suggest a transformation to a muscle  
393 precursor fate, such as that normally adopted by the sister of P<sub>4</sub>, the somatic blastomere D. This  
394 fate transformation occurs despite maintenance of P granules in Z2 and Z3 and their  
395 descendants, confirming that P granules are neither sufficient nor required to specify germ cell  
396 fate in primordial germ cells (Gallo et al., 2010; Strome et al., 1995). A similar P<sub>4</sub> → D fate  
397 transformation was reported for *pos-1* mutants (Tabara et al., 1999). The apparent P<sub>4</sub> → D fate  
398 transformation is likely incomplete as Z2 and Z3 descendants do not express muscle myosin,  
399 remain in their normal central position in embryos and first-stage larvae, and stall proliferation  
400 during the first larval stage. *meg-1 meg-2* fail to efficiently translate NOS-2 and Y51F10.2, two  
401 proteins implicated, respectively, in mRNA and protein turnover (Subramaniam and Seydoux,  
402 1999; Kipreos, 2005). We showed previously that the sterility of embryos lacking Nanos could  
403 be rescued by reducing the activity of maternal LIN-15B, a soma-promoting transcription factor  
404 expressed in oocytes (Lee et al., 2017). Similarly, the germ cell proliferation defect of *meg-1*  
405 *meg-2* larvae could be rescued partially by reducing *gld-1* activity (Kapelle and Reinke, 2011), an  
406 RNA-binding protein required for oocyte development and expressed in early P blastomeres

407 (Francis et al., 1995; Jones et al., 1996). Together these observations suggest that a key step to  
408 specify P<sub>4</sub> as the germline founder cell is to program germline P-bodies to eliminate maternal  
409 factors that function during oogenesis.

410 The germline P-bodies we describe here share several features with the recently  
411 described “founder granules” in *Drosophila* germ plasm. Founder granules contain DDX6<sup>ME31B</sup>,  
412 the decapping factor DCP1 and Oskar mRNA, which although required for germ plasm assembly  
413 in oocytes, must be degraded in embryos for proper germline development (Eichler et al.,  
414 2020). DDX6<sup>ME31B</sup> has been proposed to enrich in germ plasm independently of the canonical  
415 Oskar polar granule assembly pathway (McCambridge et al., 2020), as we demonstrate here for  
416 germline P-bodies, which assemble independently of P granules. Founder granules, however,  
417 have not yet been implicated in the translational activation of Nanos and other mRNAs  
418 enriched in polar granules, as we suggest here for germline P-bodies.

419 A role for P-bodies in early germ cell development has also been suggested by studies in  
420 mice. The mammalian Nanos homolog NANOS2 localizes to P-bodies, interacts with the CCR4-  
421 NOT1 deadenylation complex, and promotes mRNA degradation and the male germ cell fate  
422 program in mice (Suzuki et al., 2010; Shimada et al., 2019; Wright et al., 2021). DDX6/Me31B  
423 RNA helicases have also been implicated in the differentiation of various stem cell populations  
424 in human, mouse, and *Drosophila* (Di Stefano et al., 2019; Nicklas et al., 2015; Jensen et al.,  
425 2021). Together these studies suggest a conserved role for P-bodies as essential regulators of  
426 cell fate transitions in progenitors of the germline and beyond.

427

#### 428 *Limitations of the study*

429 We inferred a requirement for P-body activity in embryonic germ cells through our  
430 analyses of *meg-1 meg-2* mutants which fail to stabilize germline P-bodies and regulate  
431 maternal mRNAs in P<sub>4</sub>. We did not test directly, however, for a requirement for P-body  
432 enzymatic activity, as mutants in key P-body proteins arrest development before the birth of P<sub>4</sub>.  
433 For example, RNAi reduction of the scaffold C-NOT1<sup>N<sup>TL</sup>-1</sup> leads to early embryonic division  
434 defects, presumably because P-bodies also regulate the fate of mRNAs in somatic blastomeres  
435 (Gallo et al., 2008). The helicase DDX6<sup>CGH-1</sup> stabilizes translationally repressed mRNAs during

436 oogenesis and is essential for the production of mature oocytes that support normal  
437 embryogenesis (Boag et al., 2008; Noble et al., 2008). A DDX6<sup>CGH-1</sup> temperature-sensitive  
438 mutant is available (Scheckel et al., 2012), which could potentially allow us to bypass an earlier  
439 requirement for DDX6<sup>CGH-1</sup>, but initial experiments proved inconclusive. Although we  
440 demonstrate that MEG-1 can be immunoprecipitated from lysates in a complex with POS-1 and  
441 a subset of P-body proteins, we have not investigated whether MEG-1 binds directly to these  
442 proteins or interacts indirectly by binding RNA for example. We also do not address whether  
443 MEG-1/2 or germline P-bodies are merely required (permissive) or are sufficient (instructive) to  
444 specify germ cell fate. MEG-1/2 enrich preferentially into P blastomeres from the zygote-stage  
445 onward; mutations that prevent this localization may help determine whether MEG-1/2 play a  
446 permissive or instructive role in germ cell fate specification.

447

#### 448 **Acknowledgments:**

449 We thank John Kim and Amelia Alessi, Tom Evans, and Judith Yanowitz for the CGH-1,  
450 POS-1, and XND-1 antibodies; Dominique Rasoloson and Helen Schmidt for the MEG-1::GFP and  
451 MEG-1::OLLAS alleles; Tu Lu for the strains JH3472, JH3410, JH3404 and JH3352; the Johns  
452 Hopkins Microscope Facility (S10OD023548) for microscopy support; the Johns Hopkins  
453 University School of Medicine Genetic Resources Core Facility for sequencing support, and the  
454 JHMI Mass Spectrometry and Proteomics Facility for mass-spec support. We also thank the  
455 Seydoux lab and the Baltimore Worm Club for their insights during this project. Some strains  
456 were provided by the CGC, which is funded by NIH Office of Research Infrastructure Programs  
457 (P40 OD010440). Funding was provided by the National Institutes of Health (GS: R37HD037047;  
458 MC: T32 GM007445) and the National Science Foundation (MC: DGE-1746891). GS is an  
459 investigator of the Howard Hughes Medical Institute.

460

#### 461 **Competing Interests Statement**

462 G.S. serves on the Scientific Advisory Board of Dewpoint Therapeutics, Inc. The  
463 remaining authors declare no competing interests.

464



465 **Data availability**

466 Sequencing data has been deposited onto the Gene Expression Omnibus (GEO) and can  
467 be found using the following accession numbers:

468 #####

469 Mass spectrometry data has been deposited to the MassIVE repository and can be  
470 found with the identifier #####.

471

472 **Methods**

473 **Worm handling, RNAi, sterility counts**

474 *C. elegans* were cultured according to standard methods (Brenner, 1974). Strains used in  
475 this study are listed in Table S4. RNAi knockdown experiments were performed by feeding on  
476 HT115 bacteria (Timmons and Fire, 1998). The empty pL4440 vector was used as a negative  
477 control. Bacteria were grown at 37°C in LB + ampicillin (100 µg/mL) media for 5 hours, induced  
478 with 5 mM IPTG for 30 minutes, plated on NNGM (nematode nutritional growth media) +  
479 ampicillin (100 µg/mL) + IPTG (1 mM) plates, and grown overnight at room temperature. L4  
480 hermaphrodites were put onto RNAi plates and fed overnight at 25°C, and then shifted back to  
481 20°C for at least one hour before proceeding with further experiments. Effectiveness of  
482 knocking down *meg* genes was verified by scoring the sterility of adult progeny of the worms  
483 exposed to RNAi.

484 To culture larger numbers of worms, worm cultures were started from synchronized L1s  
485 (hatched from embryos incubated in M9 overnight) onto NA22 or RNAi bacteria containing  
486 plates and grown to gravid adults at 20°C. Early embryos were harvested from gravid adults.

487 To measure maternal-effect sterility of the *meg-1 meg-2(ax4532)* strain, 20 gravid adults  
488 from a mixed heterozygous population were singled out onto individual OP50 plates. Worms  
489 were allowed to lay eggs for 5 hours, then removed and genotyped by PCR. Adult progeny were  
490 scored for empty uteri (white sterile phenotype).

491

492 **CRISPR genome editing**

493 Genome editing was performed using CRISPR/Cas9 as described in Paix et al., 2017. The  
494 *meg-1 meg-2* open reading frame was deleted with two guide RNAs targeting the following  
495 sequences: 1. tgagcggcgatggataatcg and 2. agtcaaaattagttgctggg. Deletion of *meg-1 meg-2* was  
496 confirmed by Sanger sequencing. This strain (JH3875) is maintained as a heterozygote because  
497 the homozygous *meg-1 meg-2* deletion is 100% maternal effect sterile.

498

#### 499 **RNA extraction and preparation of mRNA-seq library**

500 For each replicate, 26,000 synchronized L1 worms were plated on HT115 bacteria  
501 transformed with either L4440 (control) or *meg-2* RNAi and grown at 20°C until the young adult  
502 stage. Adult worms were collected by filtering and the embryos were harvested by bleaching.  
503 Embryo pellets were flash frozen in liquid nitrogen. RNA was extracted with TRIzol reagent and  
504 chloroform. RNA was then concentrated and purified using Zymo's RNA Clean & Concentrator  
505 kit.

506 For mRNA-seq library preparation, 1 µg of total RNA was treated with Ribo-Zero Gold  
507 rRNA Removal Kit. A 1:100 dilution of ERCC RNA Spike-in Mix was added. Libraries were  
508 prepared using the TruSeq stranded total RNA library Prep Kit with 12 cycles of PCR  
509 amplification. All sequencing was performed using the Illumina HiSeq2500 at the Johns Hopkins  
510 University School of Medicine Genetic Resources Core Facility.

511

#### 512 **mRNA-sequencing analysis**

513 Sequencing reads were aligned to the UCSC ce10 *C. elegans* reference genome using  
514 HISAT2 (Kim et al., 2015). Reads aligning to genetic features were then counted using HTSeq-  
515 count (Anders et al., 2015) and analyzed for differential expression analysis using DESeq2 (Love  
516 et al., 2014). Genes differentially expressed in wild-type vs *meg-1 meg-2* embryos are listed in  
517 Table S3.

518

#### 519 **Immunoprecipitation**

520 For each replicate for mass spec analysis,  $1 \times 10^6$  synchronized L1 worms were grown on  
521 NA22 bacteria at 20°C until the young adult stage. For IPs to compare MEG-1::GFP and MEG-

522 3::GFP by western blotting, 4x as many MEG-3::GFP embryos were collected as MEG-1::GFP  
523 embryos, because MEG-1 is ~4x more abundant than MEG-3 (Saha et al., 2016). Adult worms  
524 were collected by filtering and the embryos were harvested by bleaching. Embryos were  
525 washed and flash frozen in IP buffer (300 mM KCl, 50 mM HEPES pH 7.4, 1 mM EGTA, 1 mM  
526 MgCl<sub>2</sub>, 1% glycerol, 0.1% NP-40) with 2x freshly prepared protease inhibitor mix #1 and mix #2  
527 (100x protease inhibitor mix #1 contained 3 mg/mL antipain, 5 mg/mL leupeptin, 10 mg/mL  
528 benzamidine, 25 mg/mL AEBSF, and 1 mg/mL phosphoramidon diluted in PBS. 100x protease  
529 inhibitor mix #2 contained 5 mg/mL aprotinin, 4 mM bestatin, 1 mg/mL E64 and 1 mg/mL  
530 trypsin inhibitor diluted in water). Thawed embryos were sonicated on ice with a Branson  
531 Digital Sonifier SFX 250 with a microtip (15s on, 45s off, 15% power, 6 minutes total on time or  
532 until embryos were completely lysed) and cleared by centrifugation at 4°C for 30 minutes at  
533 20,817 RCF.

534 For the IP, 150 µl of anti-GFP nanobody conjugated to magnetic beads (Chromotek; cat#  
535 gtma-10) were incubated with the lysates at 4°C for 90 minutes. The unbound fraction was  
536 removed and the beads were washed five times with ice cold IP buffer. The bound fraction was  
537 eluted by boiling the beads in 1% SDS with 50mM Tris-HCL pH 7.4 for 5 minutes.

538

### 539 **Western blotting**

540 1 M DTT and NuPAGE LDS sample buffer(4x) were added to lysates to a final  
541 concentration of 200 mM DTT and 1x NuPAGE LDS sample buffer. Samples were boiled for 5  
542 minutes and run on 4-12% Bis-Tris gels in MES buffer. Samples were transferred to a PVDF  
543 membrane. Membranes were blocked in PBS with 0.1% Tween 20 and 5% non-fat dry milk  
544 (PBST + 5% milk). Membranes were incubated in primary antibodies diluted in PBST + 5% milk  
545 overnight at 4°C. Membranes were washed three times for 10 minutes in PBST and then  
546 incubated with secondary antibodies diluted in PBST + 5% milk at room temperature for 1 hour.  
547 Membranes were washed again three times for 10 minutes in PBST and visualized with Pierce  
548 ECL Western Blotting Substrate (Thermo; cat# 32106) or SuperSignal West Femto Maximum  
549 Sensitivity Substrate (Thermo; cat# 34095) and the KwikQuant™ Imager (Kindle Biosciences).

550 Primary antibodies and concentrations used: mouse anti-GFP Living Colors (JL-8) (Takara  
551 Biosciences; cat# 632381) 1:500 dilution. Mouse anti- $\alpha$ -Tubulin (Sigma; cat# T6199) 1:1,000  
552 dilution. Rabbit anti-POS-1 (a gift from Tom Evans) 1:500 dilution.

553

#### 554 **Mass spectrometry**

555 Mass spectrometry was performed by the JHMI Mass Spectrometry and Proteomics  
556 Facility. Samples were reduced with DTT, alkylated with iodoacetamide, TCA/acetone  
557 precipitated, and in solution digested with trypsin. Samples were analyzed by LC-MS-MS on Q-  
558 Exactive Plus (Thermo) in FTFT at resolution 140K/35K with total 120 minute gradient.

559

#### 560 **Mass spec data analysis**

561 Raw data were processed and analyzed using MaxQuant (2.0.3.0) software (Tyanova et  
562 al., 2016a). Default settings were used except that 'Match between runs' was turned on. Search  
563 parameters were as follows: Cysteine carbamidomethyl was included as a fixed modification,  
564 and variable modifications included oxidation of methionine, protein N-terminal acetylation,  
565 deamidation of glutamine and asparagine, and phosphorylation of serine, threonine and  
566 tyrosine, and the maximum number of modifications per peptide was set to 4. Trypsin was used  
567 as the digestion enzyme, a maximum of two missed cleavages were allowed, and the minimal  
568 peptide length was set to seven amino acids. Database search was performed against Uniprot  
569 *C. elegans* database (UP000001940\_6239.fasta). False discovery rate (FDR) was set to 1% at  
570 peptide spectrum match (PSM) and protein level. Minimum peptide count required for protein  
571 quantification was set to two. Protein groups were further analyzed using Perseus (Tyanova et  
572 al., 2016b). Common contaminants, reverse proteins and proteins only identified by site were  
573 filtered out. LFQ values were  $\log_2$  transformed. Two-sample *t*-tests were performed.

574

#### 575 **Immunostaining**

576 Embryos were extruded from adult animals and subjected to freeze-crack on 0.01%  
577 poly-lysine coated slides followed by fixation in  $-20^\circ\text{C}$  methanol  $\geq 15$  minutes. Slides were  
578 blocked in PBS with 0.1% Tween 20 and 0.1% BSA (PBST + BSA) for 1 hour. Slides were

579 incubated in primary antibodies diluted in PBST + BSA at 4°C in a humidity chamber overnight.  
580 Slides were washed three times in PBST for 5 minutes and then incubated in secondary  
581 antibodies diluted in PBST + BSA for 1 hour at room temperature. Slides were washed again  
582 three times in PBST for 5 minutes, then two quick washes in PBS. Samples were mounted in  
583 ProLong Glass Antifade mountant and cured overnight. When co-staining with OLLAS antibody,  
584 the OLLAS primary and secondary were applied first to avoid cross reactions.

585 Primary antibodies and concentrations used: Mouse anti-FLAG M2 (Sigma; cat# F1804)  
586 1:500. Rat anti-OLLAS L2 (Novus; cat# 06713) 1:50. Rabbit anti-CGH-1 (a gift from John Kim;  
587 Alessi et al., 2015) 1:1,000. Rabbit anti-POS-1 (a gift from Tom Evans; Barbee and Evans, 2006)  
588 1:100. Guinea pig anti-XND-1 (a gift from Judith Yanowitz; Wagner et al., 2010) 1:2,000. Mouse  
589 anti-PGL-3 KT3 (DSHB) 1:100. Mouse anti-PGL-1 OIC1D4 (DSHB) 1:10. Mouse anti-UNC-54 mAB  
590 5-8 (DSHB) 1:10. Anti-GFP nanobody conjugated to Alexa Fluor 488 (Chromotek; cat#  
591 gb2AF488-10) 1:500. Antibody staining in this manuscript was consistent with that of previously  
592 published works.

593

#### 594 **Single molecule fluorescence in situ hybridization (smFISH)**

595 smFISH probes were designed using Biosearch Technologie's Stellaris Probe Designer.  
596 Fluorophores used in this study were Quasar570 and Quasar670. For sample preparation,  
597 embryos were extruded from adult animals and subjected to freeze-crack on 0.01% poly-lysine  
598 coated slides followed by fixation in -20°C methanol for ≥ 15 minutes. Slides were washed five  
599 times in PBS with 0.1% Tween 20 (PBST) and fixed in 4% PFA in PBS for 1 hour at room  
600 temperature. Slides were again washed four times in PBST, twice in 2x SSC, and once in wash  
601 buffer (10% formamide, 2x SSC). Slides were then blocked in hybridization buffer (10%  
602 formamide, 2x SSC, 200 µg/mL BSA, 2mM Ribonucleoside Vanadyl Complex, 0.2 mg/mL yeast  
603 total RNA, 10% dextran sulfate) for 30 minutes at 37°C in a humid chamber. For hybridization,  
604 slides were incubated in 50-100 nM probe in hybridization buffer at 37°C overnight. Slides were  
605 then washed twice in wash buffer at 37°C for 30 minutes, twice in 2x SSC, once in PBST and  
606 twice in PBS. Samples were mounted in ProLong Glass Antifade mountant and cured overnight.

607

## 608 **Combined *in situ* hybridization/immunofluorescence**

609 Combined *in situ* hybridization with immunofluorescence was done by first doing the *in*  
610 *situ* protocol as described above. After the last wash in PBS, the slides were then re-fixed in 4%  
611 PFA for 1 hour at room temperature. The immunofluorescence protocol was then carried out as  
612 described above except 1 mg/mL UltraPure BSA (Thermo, cat# AM2616) was used in the  
613 blocking and antibody incubation steps. Primary antibody used: KT3 (DSHB) 1:100. Secondary  
614 antibody used: goat anti-mouse IgA conjugated to FITC (abcam, cat# ab97234) 1:500.

615

## 616 **Laser scanning confocal microscopy**

617 Super-resolution microscopy was performed using a Zeiss LSM 880 microscope with a  
618 63x-1.4 numerical aperture objective (Fig. 1, Fig. 3A, Fig. 4A, Fig. S1A,C, and Fig. S3A,B). The raw  
619 data was processed using default Airyscan settings with ZEN software. For Fig. 4A,  
620 representative high-resolution images were shown while the images used for quantification in  
621 Fig. 4B were collected by spinning disk confocal microscopy. All images shown are single Z  
622 slices.

623

## 624 **Spinning disk confocal microscopy**

625 All other microscopy was performed using a Zeiss Axio Observer equipped with a CSU-  
626 W1 SoRA spinning disk scan head (Yokogawa). Images were taken using Slidebook software  
627 software (Intelligent Imaging Innovations) with a 63x objective with a 2.8x relay lens  
628 (Yokogawa). All images shown are single Z slices, except in Fig. 7C and D.

629

## 630 **Image quantification**

631 All images were quantified in Fiji. For profile plots to show colocalization of granule  
632 components, a line was drawn through the center of a granule and the intensity along that line  
633 was measured using the plot profile tool in Fiji. Since the size of each granule varied slightly, the  
634 length of each plot was normalized to the smallest granule size. The intensities were then  
635 binned using the averageifs function in Excel. The background signal was subtracted and the  
636 intensities were normalized to the highest intensity.

637 For quantification of conditions that included sparse or asymmetrically localized  
638 RNAs/Proteins in  $P_4$ , the sum intensity in  $P_4$  above threshold was measured and normalized to  
639 wild-type controls. The threshold was defined as being 1.5x the mean intensity of the entire  
640 embryo. To minimize background, the smooth function in Fiji was used, which replaces each  
641 pixel with the average of its 3x3 neighbors.

642 For quantification of symmetrically localized RNA/proteins in  $P_4$ , the ratio of the mean  
643 intensity in the P blastomere over the mean intensity of a same sized region in the soma was  
644 measured. A background measurement was taken from outside the embryo and subtracted  
645 from the germline and soma intensities. The ratios were then normalized to wild type.

646 To assess the segregation of PGL-3 (Fig. S1D), DDX6<sup>CGH-1</sup> and EDC-3 (Fig. S4) into P  
647 blastomeres, the mean intensity was measured in each P blastomere and were then normalized  
648 to the average  $P_0$  intensity.

649 To measure the ratio of RNA inside/outside of granules, the granule (labeled by MEG-  
650 1::GFP in Fig. 3B, SL1 in Fig. S5 or PGL-3 in Fig. S7) was defined as being 1.5x above the mean  
651 intensity of the signal within the P blastomere. The mean intensity inside and outside the  
652 granule in the cytoplasm was measured. A background signal was taken from a region outside  
653 the embryo and subtracted.

654

### 655 **Statistical analysis and plotting**

656 Perseus (Tyanova et al., 2016b) was used for *t*-tests on mass spec data. To determine  
657 the significance of the enrichment of P-body proteins in MEG-1 immunoprecipitates, we  
658 assumed a total pool of 6,000 proteins, which is roughly the size of the embryonic proteome  
659 (Saha et al., 2016).

660 Statistics for differential expression analysis were done using DESeq2 (Love et al., 2014).  
661 To determine the significance of the overlap between predicted POS-1 targets (Elewa et al.,  
662 2015) and *meg-1 meg-2* differentially expressed genes, we assumed a total pool of 11,121  
663 transcripts. We arrived at this number by setting an FPKM threshold in our RNA-seq analysis of  
664 0.002178852 FPKM, which was the lowest FPKM in *meg-1 meg-2* animals that we were able to

665 detect a significant increase in gene expression. Any non-protein coding genes were also  
666 identified and removed from the list by using the SimpleMine tool on WormBase.

667 All other statistical analysis was conducted using R or Graphpad Prism 9 software. Data  
668 were plotted with either Graphpad Prism 9 or ggplot2 (Wickham, 2016).

669

## 670 **References**

671

672 Alessi, A. F., Khivansara, V., Han, T., Freeberg, M. A., Moresco, J. J., Tu, P. G., ... Kim, J. K. (2015).  
673 Casein kinase II promotes target silencing by miRISC through direct phosphorylation of the  
674 DEAD-box RNA helicase CGH-1. *Proceedings of the National Academy of Sciences of the United*  
675 *States of America* 112, E7213–E7222.

676

677 Anders, S., Pyl, P.T., and Huber, W. (2015). HTSeq—a Python framework to work with high-  
678 throughput sequencing data. *Bioinformatics* 31, 166–169.

679

680 Aravin, A. A., Van Der Heijden, G. W., Castaneda, J., Vagin, V. V., Hannon, G. J., and Bortvin, A.  
681 (2009). Cytoplasmic compartmentalization of the fetal piRNA pathway in mice. *PLoS Genetics* 5,  
682 e1000764.

683

684 Arkov, A. L., and Ramos, A. (2010). Building RNA-protein granules: Insight from the germline.  
685 *Trends in Cell Biology* 20, 482–490.

686

687 Barbee, S. A. and Evans, T. C. (2006). The Sm proteins regulate germ cell specification during  
688 early *C. elegans* embryogenesis. *Developmental Biology* 291, 132–143.

689

690 Boag, P. R., Atalay, A., Robida, S., Reinke, V., and Blackwell, T. K. (2008). Protection of specific  
691 maternal messenger RNAs by the P-body protein CGH-1 (Dhh1/RCK) during *Caenorhabditis*  
692 *elegans* oogenesis. *Journal of Cell Biology* 182, 543–557.

693



694 Boag, P. R., Nakamura, A., and Blackwell, T. K. (2005). A conserved RNA-protein complex  
695 component involved in physiological germline apoptosis regulation in *C. elegans*. *Development*  
696 132, 4975–4986.  
697

698 Brangwynne, C.P., Eckmann, C.R., Courson, D.S. Rybarska, A., Hoege, C., Gharakhani, J., Jülicher,  
699 F., and Hyman, A.A. (2009). Germline P granules are liquid droplets that localize by controlled  
700 dissolution/condensation. *Science* 324, 1729–1732.  
701

702 Brenner, S. (1974). The genetics of *Caenorhabditis elegans*. *Genetics* 77, 71-94.  
703

704 Cao, W. X., Kabelitz, S., Gupta, M., Yeung, E., Lin, S., Rammelt, C., ... Lipshitz, H. D. (2020).  
705 Precise Temporal Regulation of Post-transcriptional Repressors Is Required for an Orderly  
706 *Drosophila* Maternal-to-Zygotic Transition. *Cell Reports* 31, 107783.  
707

708 Ciais, D., Cherradi, N., and Feige, J. J. (2013). Multiple functions of tristetraprolin/TIS11 RNA-  
709 binding proteins in the regulation of mRNA biogenesis and degradation. *Cellular and Molecular*  
710 *Life Sciences* 70, 2031–2044.  
711

712 D’Agostino, I., Merritt, C., Chen, P. L., Seydoux, G., and Subramaniam, K. (2006). Translational  
713 repression restricts expression of the *C. elegans* Nanos homolog NOS-2 to the embryonic  
714 germline. *Developmental Biology* 292, 244–252.  
715

716 DeMott, E., Dickinson, D.J., Doonan, R. (2021). Highly improved cloning efficiency for plasmid-  
717 based CRISPR knock-in in *C. elegans*. *microPublication Biology*  
718 10.17912/micropub.biology.000499.  
719

720 Di Stefano, B., Luo, E. C., Haggerty, C., Aigner, S., Charlton, J., Brumbaugh, J., ... Hochedlinger, K.  
721 (2019). The RNA Helicase DDX6 Controls Cellular Plasticity by Modulating P-Body  
722 Homeostasis. *Cell Stem Cell* 25, 622-638.

723

724 Dodson, A. E., and Kennedy, S. (2019). Germ Granules Coordinate RNA-Based Epigenetic  
725 Inheritance Pathways. *Developmental Cell* 50, 704-715.

726

727 Eckmann, C. R., Kraemer, B., Wickens, M., and Kimble, J. (2002). GLD-3, a bicaudal-C homolog  
728 that inhibits FBF to control germline sex determination in *C. elegans*. *Developmental Cell* 3,  
729 697–710.

730

731 Eichler, C. E., Hakes, A. C., Hull, B., and Gavis, E. R. (2020). Compartmentalized *oskar*  
732 degradation in the germ plasm safeguards germline development. *ELife* 9, e49988.

733

734 Elewa, A., Shirayama, M., Kaymak, E., Harrison, P. F., Powell, D. R., Du, Z., ... Mello, C. C. (2015).  
735 POS-1 Promotes Endo-mesoderm Development by Inhibiting the Cytoplasmic Polyadenylation  
736 of *neg-1* mRNA. *Developmental Cell* 34, 108–118.

737

738 Farley, B. M., Pagano, J. M., and Ryder, S. P. (2008). RNA target specificity of the embryonic cell  
739 fate determinant POS-1. *RNA* 14, 2685–2697.

740

741 Folkmann, A. W., Putnam, A., Lee, C. F., and Seydoux, G. (2021). Regulation of biomolecular  
742 condensates by interfacial protein clusters. *Science* 373, 1218–1224.

743

744 Francis, R., Barton, M.K., Kimble, J., and Schedl, T. (1995). *gld-1*, a tumor suppressor gene  
745 required for oocyte development in *Caenorhabditis elegans*. *Genetics* 139, 579–606.

746

747 Gallo, C. M., Munro, E., Rasoloson, D., Merritt, C., and Seydoux, G. (2008). Processing bodies  
748 and germ granules are distinct RNA granules that interact in *C. elegans* embryos.

749 *Developmental Biology* 323, 76–87.

750

751 Gallo, C. M., Wang, J. T., Fumio, M., and Seydoux, G. (2010). Cytoplasmic Partitioning of P  
752 Granule Components Is Not Required to Specify the Germline in *C. elegans*. *Science* 330, 1685–  
753 1689.  
754  
755 Han, B., Antkowiak, K. R., Fan, X., Rutigliano, M., Ryder, S. P., and Griffin, E. E. (2018). Polo-like  
756 Kinase Couples Cytoplasmic Protein Gradients in the *C. elegans* Zygote. *Current Biology* 28, 60–  
757 69.  
758  
759 Hanazawa, M., Yonetani, M., and Sugimoto, A. (2011) PGL proteins self associate and bind RNPs  
760 to mediate germ granule assembly in *C. elegans*. *Journal of Cell Biology* 192, 929–937.  
761  
762 Hubatsch, L., Peglion, F., Reich, J. D., Rodrigues, N. T. L., Hirani, N., Illukkumbura, R., and  
763 Goehring, N. W. (2019). A cell-size threshold limits cell polarity and asymmetric division  
764 potential. *Nature Physics* 15, 1078–1085.  
765  
766 Ivanov, P., Kedersha, N., and Anderson, P. (2019). Stress granules and processing bodies in  
767 translational control. *Cold Spring Harbor Perspectives in Biology* 11, a032813.  
768  
769 Jadhav, S., Rana, M., and Subramaniam, K. (2008). Multiple maternal proteins coordinate to  
770 restrict the translation of *C. elegans nanos-2* to primordial germ cells. *Development* 135, 1803–  
771 1812.  
772  
773 Jensen, L., Venkei, Z. G., Watase, G. J., Bisai, B., Pletcher, S., Lee, C. Y., and Yamashita, Y. M.  
774 (2021). *me31B* regulates stem cell homeostasis by preventing excess dedifferentiation in the  
775 *Drosophila* male germline. *Journal of Cell Science* 134, 1-10.  
776  
777 Jones, A.R., Francis, R., and Schedl, T. (1996). GLD-1, a cytoplasmic protein essential for oocyte  
778 differentiation, shows stage- and sex-specific expression during *Caenorhabditis elegans*  
779 germline development. *Developmental Biology* 180, 165–183.

780

781 Kapelle, W. S., and Reinke, V. (2011). *C. elegans meg-1* and *meg-2* differentially interact with  
782 *nanos* family members to either promote or inhibit germ cell proliferation and  
783 survival. *Genesis* 49, 380–391.

784

785 Kempf, A. and Lynch, J. A. (2022). Evolution of germ plasm assembly and function among the  
786 insects. *Current Opinion in Insect Science* 50, 100883.

787

788 Kim, D., Langmead, B., and Salzberg, S.L. (2015). HISAT: a fast spliced aligner with low memory  
789 requirements. *Nat. Methods* 12, 357–360.

790

791 Kipreos, E. T. (2005). Ubiquitin-mediated pathways in *C. elegans*. *WormBook: The Online Review*  
792 *of C. Elegans Biology*, 1–24.

793

794 Kulkarni, A. and Extavour, C. G. (2017). Convergent evolution of germ granule nucleators: A  
795 hypothesis. *Stem Cell Research* 24, 188–194.

796

797 Leacock, S.W. and Reinke, V. (2008). MEG-1 and MEG-2 are embryo-specific P-granule  
798 components required for germline development in *Caenorhabditis elegans*. *Genetics* 178, 295–  
799 306.

800

801 Lee, C.Y. S., Lu, T., and Seydoux, G. (2017). Nanos promotes epigenetic reprogramming of the  
802 germline by down-regulation of the THAP transcription factor LIN-15B. *ELife* 6, e30201.

803

804 Lee, C. Y. S., Putnam, A., Lu, T., He, S., Ouyang, J. P. T., and Seydoux, G. (2020). Recruitment of  
805 mRNAs to P granules by condensation with intrinsically-disordered proteins. *ELife* 9, e52896.

806

807 Love, M. I., Huber, W., and Anders, S. (2014). Moderated estimation of fold change and  
808 dispersion for RNA-seq data with DESeq2. *Genome Biology* 15, 550.

809

810 Mainpal, R., Nance, J., and Yanowitz, J. L. (2015). A germ cell determinant reveals parallel  
811 pathways for germ line development in *Caenorhabditis elegans*. *Development* 142, 3571–3582.

812

813 McCambridge, A., Solanki, D., Olchawa, N., Govani, N., Trinidad, J. C., and Gao, M. (2020).  
814 Comparative Proteomics Reveal Me31B's Interactome Dynamics, Expression Regulation, and  
815 Assembly Mechanism into Germ Granules during *Drosophila* Germline Development. *Scientific*  
816 *Reports* 10, 1–13.

817

818 Neil, C. R., Jeschonek, S. P., Cabral, S. E., O'Connell, L. C., Powrie, E. A., Otis, J. P., ... Mowry, K. L.  
819 (2021). L-bodies are RNA-protein condensates driving RNA localization in *Xenopus* oocytes.  
820 *Molecular Biology of the Cell* 32, ar37.

821

822 Nicklas, S., Okawa, S., Hillje, A. L., González-Cano, L., Sol, A. D., and Schwamborn, J. C. (2015).  
823 The RNA helicase DDX6 regulates cell-fate specification in neural stem cells via miRNAs. *Nucleic*  
824 *Acids Research* 43, 2638–2654.

825

826 Noble, S. L., Allen, B. L., Goh, L. K., Nordick, K., and Evans, T. C. (2008). Maternal mRNAs are  
827 regulated by diverse P-body-related mRNP granules during early *Caenorhabditis elegans*  
828 development. *Journal of Cell Biology* 182, 559–572.

829

830 Ouyang, J. P. T., Folkmann, A., Bernard, L., Lee, C. Y., Seroussi, U., Charlesworth, A. G., ...  
831 Seydoux, G. (2019). P Granules Protect RNA Interference Genes from Silencing by piRNAs.  
832 *Developmental Cell* 50, 716-728.

833

834 Paix, A., Folkmann, A., and Seydoux, G. (2017). Precision genome editing using CRISPR-Cas9 and  
835 linear repair templates in *C. elegans*. *Methods* 121-122, 86–93.

836

837 Paix, A., Wang, Y., Smith, H. E., Lee, C. Y. S., Calidas, D., Lu, T., ... Seydoux, G. (2014). Scalable  
838 and versatile genome editing using linear DNAs with microhomology to Cas9 sites in  
839 *Caenorhabditis elegans*. *Genetics* 198, 1347–1356.

840

841 Phillips, C. M. and Updike, D. L. (2022). Germ granules and gene regulation in the  
842 *Caenorhabditis elegans* germline. *Genetics* 220, iyab195.

843

844 Putnam, A., Cassani, M., Smith, J., and Seydoux, G. (2019). A gel phase promotes condensation  
845 of liquid P granules in *Caenorhabditis elegans* embryos. *Nature Structural and Molecular*  
846 *Biology* 26, 220–226.

847

848 Roovers, E. F., Kaaij, L. J. T., Redl, S., Bronkhorst, A. W., Wiebrands, K., de Jesus Domingues, A.  
849 M., ... Ketting, R. F. (2018). Tdrd6a Regulates the Aggregation of Buc into Functional Subcellular  
850 Compartments that Drive Germ Cell Specification. *Developmental Cell* 46, 285-301.

851

852 Saha, S., Weber, C. A., Nusch, M., Adame-Arana, O., Hoege, C., Hein, M. Y., ... Hyman, A. A.  
853 (2016). Polar Positioning of Phase-Separated Liquid Compartments in Cells Regulated by an  
854 mRNA Competition Mechanism. *Cell* 166, 1572-1584.

855

856 Scheckel, C., Gaidatzis, D., Wright, J. E., and Ciosk, R. (2012). Genome-wide analysis of GLD-1-  
857 mediated mRNA regulation suggests a role in mRNA storage. *PLoS Genetics* 8, 1–12.

858

859 Schmidt, H., Putnam, A., Rasoloson, D., and Seydoux, G. (2021). Protein-based condensation  
860 mechanisms drive the assembly of RNA-rich P granules. *ELife* 10, e63698.

861

862 Seydoux, G., and Fire, A. (1994). Soma-germline asymmetry in the distributions of embryonic  
863 RNAs in *Caenorhabditis elegans*. *Development* 120, 2823–2834.

864

865 Shimada, R., Kiso, M., and Saga, Y. (2019). ES-mediated chimera analysis revealed requirement  
866 of DDX6 for NANOS2 localization and function in mouse germ cells. *Scientific Reports* 9, 1-12.

867

868 Smith, J., Calidas, D., Schmidt, H., Lu, T., Rasoloson, D., and Seydoux, G. (2016). Spatial  
869 patterning of P granules by RNA-induced phase separation of the intrinsically-disordered  
870 protein MEG-3. *ELife* 5, e21337.

871

872 Strome, S., Martin, P., Schierenberg, E., and Paulsen, J. (1995). Transformation of the germ line  
873 into muscle in *mes-1* mutant embryos of *C. elegans*. *Development* 121, 2961–2972.

874

875 Strome, S. and Wood, W. B. (1982). Immunofluorescence visualization of germ-line-specific  
876 cytoplasmic granules in embryos, larvae, and adults of *Caenorhabditis elegans*. *Proceedings of*  
877 *the National Academy of Sciences of the United States of America* 79, 1558–1562.

878

879 Subramaniam, K. and Seydoux, G. (1999). *nos-1* and *nos-2*, two genes related to *Drosophila*  
880 *nanos*, regulate primordial germ cell development and survival in *Caenorhabditis elegans*.  
881 *Development* 126, 4861–4871.

882

883 Suzuki, A., Igarashi, K., Aisaki, K. I., Kanno, J., and Saga, Y. (2010). NANOS2 interacts with the  
884 CCR4-NOT deadenylation complex and leads to suppression of specific RNAs. *Proceedings of the*  
885 *National Academy of Sciences of the United States of America* 107, 3594–3599.

886

887 Tabara, H., Hill, R. J., Mello, C. C., Priess, J. R., and Kohara, Y. (1999). *pos-1* encodes a  
888 cytoplasmic zinc-finger protein essential for germline specification in *C.*  
889 *elegans*. *Development* 126, 1–11.

890

891 Timmons, L. and Fire, A. (1998). Specific interference by ingested dsRNA. *Nature* 395, 854.

892

893 Tintori, S. C., Osborne Nishimura, E., Golden, P., Lieb, J. D., and Goldstein, B. (2016). A  
894 Transcriptional Lineage of the Early *C. elegans* Embryo. *Developmental Cell* 38, 430–444.  
895

896 Tyanova, S., Temu, T., and Cox, J. (2016a) The MaxQuant computational platform for mass  
897 spectrometry-based shotgun proteomics. *Nature Protocols* 11, 2301–2319.  
898

899 Tyanova, S., Temu, T., Sinitcyn, P., Carlson, A., Hein, M.Y., Geiger, T., Mann, M., and Cox, J.  
900 (2016b) The Perseus computational platform for comprehensive analysis of (prote)omics data  
901 *Nature Methods* 13, 731–740.  
902

903 Uebel, C. J., Agbede, D., Wallis, D. C., and Phillips, C. M. (2020). Mutator foci are regulated by  
904 developmental stage, RNA, and the germline cell cycle in *Caenorhabditis elegans*. *G3: Genes,*  
905 *Genomes, Genetics* 10, 3719–3728.  
906

907 Uebel, C. J., Manage, K. I., and Phillips, C. M. (2021). SIMR foci are found in the progenitor germ  
908 cells of *C. elegans* embryos. *MicroPublication Biology* 10.17912/micropub.biology.000374.  
909

910 Updike, D. L., Hachey, S. J., Kreher, J., and Strome, S. (2011). P granules extend the nuclear pore  
911 complex environment in the *C. elegans* germ line. *Journal of Cell Biology* 192, 939–948.  
912

913 Vo, H. D. L., Wahiduzzaman, Tindell, S. J., Zheng, J., Gao, M., and Arkov, A. L. (2019). Protein  
914 components of ribonucleoprotein granules from *Drosophila* germ cells oligomerize and show  
915 distinct spatial organization during germline development. *Scientific Reports* 9, 1–12.  
916

917 Wagner, C. R., Kuervers, L., Baillie, D. L., and Yanowitz, J. L. (2010). *xnd-1* regulates the global  
918 recombination landscape in *Caenorhabditis elegans*. *Nature* 467, 839–843.  
919



920 Wan, G., Fields, B. D., Spracklin, G., Shukla, A., Phillips, C. M., and Kennedy, S. (2018).  
921 Spatiotemporal regulation of liquid-like condensates in epigenetic inheritance. *Nature* 557,  
922 679–683.  
923  
924 Wang, J.T., Seydoux, G. (2013). Germ Cell Specification. In: Schedl, T. (eds) Germ Cell  
925 Development in *C. elegans*. Advances in Experimental Medicine and Biology, vol 757. Springer,  
926 New York, NY.  
927  
928 Wang, J.T., Smith, J., Chen, B. C., Schmidt, H., Rasoloson, D., Paix, A., ... Seydoux, G. (2014).  
929 Regulation of RNA granule dynamics by phosphorylation of serine-rich, intrinsically disordered  
930 proteins in *C. elegans*. *ELife* 3, e04591.  
931  
932 Wang, L., Eckmann, C. R., Kadyk, L. C., Wickens, M., and Kimble, J. (2002). A regulatory  
933 cytoplasmic poly(A) polymerase in *Caenorhabditis elegans*. *Nature* 419, 312–316.  
934  
935 Wickham, H. (2016). *ggplot2: Elegant Graphics for Data Analysis*. New York: Springer-Verlag.  
936  
937 Wright, D., Kiso, M., and Saga, Y. (2021). Genetic and structural analysis of the in vivo functional  
938 redundancy between murine NANOS2 and NANOS3. *Development* 148, 1–12.  
939  
940 Wu, E., Vashisht, A. A., Chapat, C., Flamand, M. N., Cohen, E., Sarov, M., ... Duchaine, T. F.  
941 (2017). A continuum of mRNP complexes in embryonic microRNA-mediated silencing. *Nucleic*  
942 *Acids Research* 45, 2081–2098.  
943  
944 Yang, C., Dominique, G. M., Champion, M. M., and Huber, P. W. (2022). Remnants of the  
945 Balbiani body are required for formation of RNA transport granules in *Xenopus* oocytes.  
946 *IScience* 25, 103878.  
947

948 Zavortink, M., Rutt, L. N., Dzitoyeva, S., Henriksen, J. C., Barrington, C., Bilodeau, D. Y., ...  
 949 Rissland, O. S. (2020). The E2 Marie Kondo and the CTLH E3 ligase clear deposited RNA binding  
 950 proteins during the maternal-to-zygotic transition. *ELife* 9, e53889.

951

952

953

954 **Supplemental table 1: Sterility of *meg-1 meg-2(ax4532)* mutant.**

| Genotype                                               | percent sterile (n) |
|--------------------------------------------------------|---------------------|
| MEG-1::GFP/ <i>meg-1 meg-2 (ax4532)</i> (+/-)          | 0 (289)             |
| <i>meg-1 meg-2 (ax4532)/meg-1 meg-2 (ax4532)</i> (-/-) | 100 (156)           |

955

956

957 **Supplemental table 4: Strains used.**

| Designation | Genotype                                                                                                        | Citation                 |
|-------------|-----------------------------------------------------------------------------------------------------------------|--------------------------|
| JH1         | N2                                                                                                              | Brenner, 1974            |
| JH2878      | <i>meg-1(vr10)</i> X                                                                                            | Leacock and Reinke, 2008 |
| JH3475      | <i>meg-3(ax3055) meg-4(ax3052)</i> X                                                                            | Smith et al., 2016       |
| JH3229      | <i>meg-1(vr10) meg-3(tm4259)</i> X                                                                              | Wang et al., 2014        |
| JH3875      | <i>meg-1 meg-2(ax4532)/meg-1(ax4534[meg-1::gfp])</i> X                                                          | this study               |
| JH3888      | <i>meg-3(ax3051[meg-3::OLLAS]) meg-4(ax2080[meg-4::3xFLAG]) meg-1 meg-2(ax4532)/meg-1(ax4534[meg-1::gfp])</i> X | this study               |
| JH3379      | <i>meg-1(ax4534[meg-1::gfp])</i> X                                                                              | this study               |
| JH3472      | <i>meg-1(ax4534[meg-1::gfp]) meg-3(tm4259) meg-4(ax2026)</i> X                                                  | this study               |
| JH4181      | <i>meg-1(ax4534[meg-1::gfp]) meg-3(ax3051[meg-3::OLLAS]) meg-4(ax2080[meg-4::3xFLAG])</i> X                     | this study               |

|        |                                                                                                      |                     |
|--------|------------------------------------------------------------------------------------------------------|---------------------|
| JH3852 | <i>pgl-3(ax4300[pgl-3::mCherry])V; meg-1(ax4534[meg-1::gfp]) X</i>                                   | this study          |
| JH3503 | <i>meg-3(ax3054[meg-3::meGFP]) X</i>                                                                 | Smith et al., 2016  |
| JH4219 | <i>meg-3(ax3054[meg-3::meGFP]) meg-1(vr10) X</i>                                                     | this study          |
| GLW43  | <i>edc-3(utx35[mNG::3xFlag::edc-3]) I</i>                                                            | DeMott et al., 2021 |
| JH4176 | <i>edc-3(utx35[mNG::3xFlag::edc-3]) I; meg-1(vr10) X</i>                                             | this study          |
| JH4177 | <i>edc-3(utx35[mNG::3xFlag::edc-3]) I; meg-3(ax3055) meg-4(ax3052) X</i>                             | this study          |
| JH4178 | <i>edc-3(utx35[mNG::3xFlag::edc-3]) I; meg-1(vr10) meg-3(tm4259) X</i>                               | this study          |
| JH4180 | <i>edc-3(utx35[mNG::3xFlag::edc-3]) I; meg-1(ax4535[meg-1::ollas]) meg-3(ax3055) meg-4(ax3052) X</i> | this study          |
| JH3193 | <i>nos-2(ax2049[3xflag::nos-2]) II</i>                                                               | Paix et al., 2014   |
| JH3410 | <i>nos-2(ax2049[3xflag::nos-2]) II; meg-1(vr10) X</i>                                                | this study          |
| JH4258 | <i>nos-2(ax2049[3xflag::nos-2]) II; meg-3(ax3055) meg-4(ax3052) X</i>                                | Lee et al., 2020    |
| JH3882 | <i>nos-2(ax2049[3xflag::nos-2]) II; meg-1(vr10) meg-3(tm4259) X</i>                                  | this study          |
| JH3605 | <i>Y51F10.2(ax4319[Y51F10.2::OLLAS]) I</i>                                                           | Lee et al., 2020    |
| JH3880 | <i>Y51F10.2(ax4319[Y51F10.2::OLLAS]) I; meg-1(vr10) X</i>                                            | this study          |
| JH3611 | <i>Y51F10.2(ax4319[Y51F10.2::OLLAS]) I; meg-3(ax3055) meg-4(ax3052) X</i>                            | Lee et al., 2020    |
| JH3881 | <i>Y51F10.2(ax4319[Y51F10.2::OLLAS]) I; meg-1(vr10) meg-3(tm4259) X</i>                              | this study          |
| JH3207 | <i>deps-1(ax2063[deps-1::GFP]) I</i>                                                                 | Paix et al., 2014   |
| JH3404 | <i>deps-1(ax2063[deps-1::GFP]) I; meg-1(vr10)</i>                                                    | this study          |

|        |                                                                                      |                  |
|--------|--------------------------------------------------------------------------------------|------------------|
|        |                                                                                      |                  |
| JH3352 | <i>deps-1(ax2063[deps-1::GFP])</i>  ; <i>meg-3(tm4259)</i><br><i>meg-4(ax2026)</i> X | this study       |
| YY1325 | <i>wago-4(gg620[3xflag::gfp::wago-4])</i>                                            | Wan et al., 2018 |
| JH3871 | <i>wago-4(gg620[3xflag::gfp::wago-4])</i>   ; <i>meg-1(vr10)</i> X                   | this study       |

958

959

960

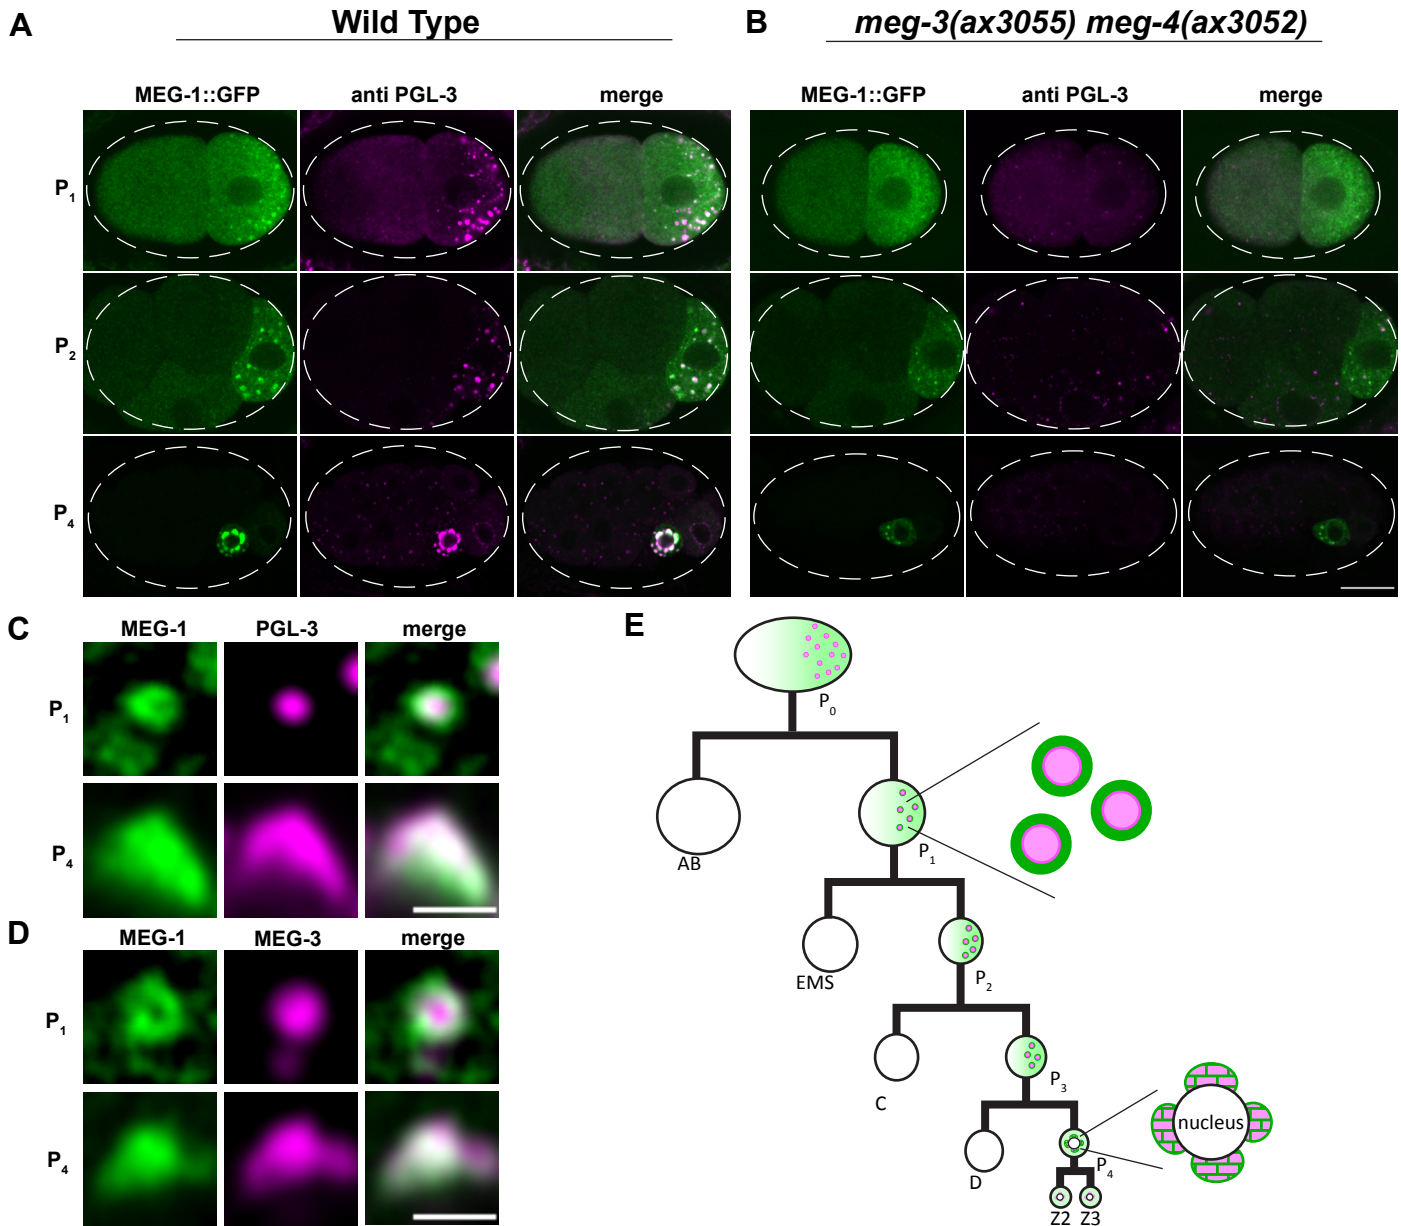

**Fig. 1: MEG-1 puncta are distinct from P granules.**

Representative Airyscan photomicrographs of wild-type (A) and *meg-3 meg-4* mutant (B) embryos expressing endogenous MEG-1::GFP and co-stained for GFP and PGL-3. MEG-1, but not PGL-3, enriches in P blastomeres in *meg-3 meg-4* embryos. Scale bar is 10  $\mu$ m. (C and D) Higher resolution images of MEG-1::GFP and PGL-3 (C) and MEG-1::GFP and MEG-3::OLLAS (D) in P<sub>1</sub> and P<sub>4</sub>. In P<sub>1</sub>, MEG-1 enriches at the periphery of PGL-3 and MEG-3. In P<sub>4</sub>, P granules become perinuclear and MEG-1 and PGL-3/MEG-3 overlap. See Fig. S1A for quantification. Scale bars are 1  $\mu$ m. (E) Abbreviated cartoon lineage summarizing the distribution of MEG-1 (green) and P granules (pink) in the germline (P) blastomeres. In the zygote P<sub>0</sub>, MEG-1 is present in a cytoplasmic gradient as well as small granules that are difficult to visualize at this stage. MEG-1 enriches at the periphery of P granules in the P<sub>1-3</sub> blastomeres, and merges with P granules in P<sub>4</sub>. In the primordial germ cells Z2 and Z3, MEG-1 becomes cytoplasmic and is degraded, while P granules remain.

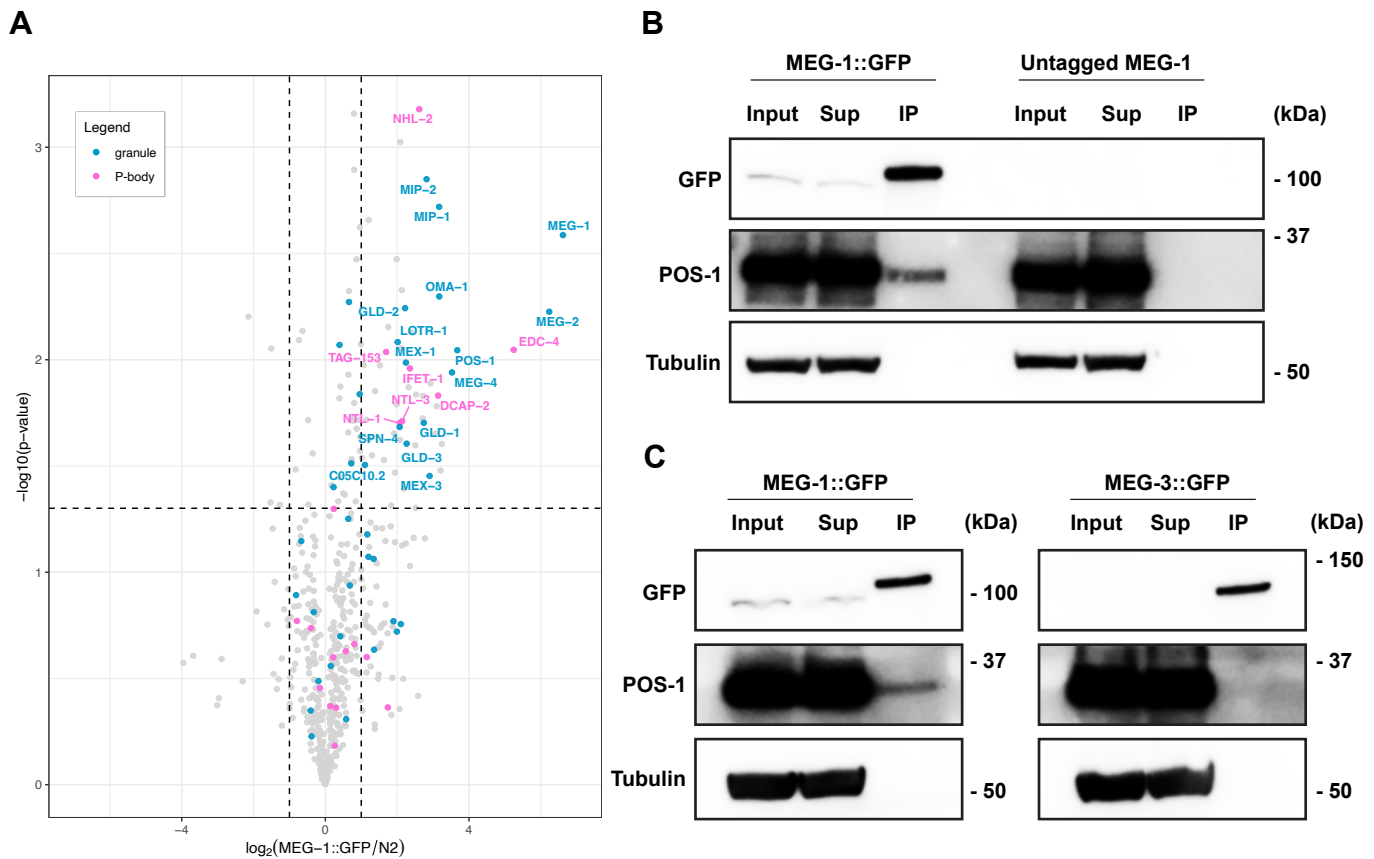

**Fig. 2: MEG-1 immunoprecipitates with P-body and RNA-binding proteins, including POS-1.**

(A) Volcano plot showing on the X-axis the log<sub>2</sub> fold enrichment of proteins (dots) in MEG-1::GFP immunoprecipitates over “N2” (wild-type lysates containing untagged MEG-1) as a function of the log<sub>10</sub> *p*-value calculated from two independent immunoprecipitation experiments (Y-axis). Of the 54 proteins enriched in MEG-1::GFP immunoprecipitates (top right quadrant), 13% correspond to P-body proteins (labeled in pink) and 28% correspond to proteins previously reported to localize to granules in P blastomeres (blue). (B) Representative western blots from two independent experiments confirm that GFP immunoprecipitates pull down MEG-1::GFP and POS-1, but not tubulin. (C) Western blots from MEG-1::GFP and MEG-3::GFP immunoprecipitates. Unlike MEG-1::GFP, MEG-3::GFP does not pull down POS-1. Full western blot images are shown in Fig. S2.

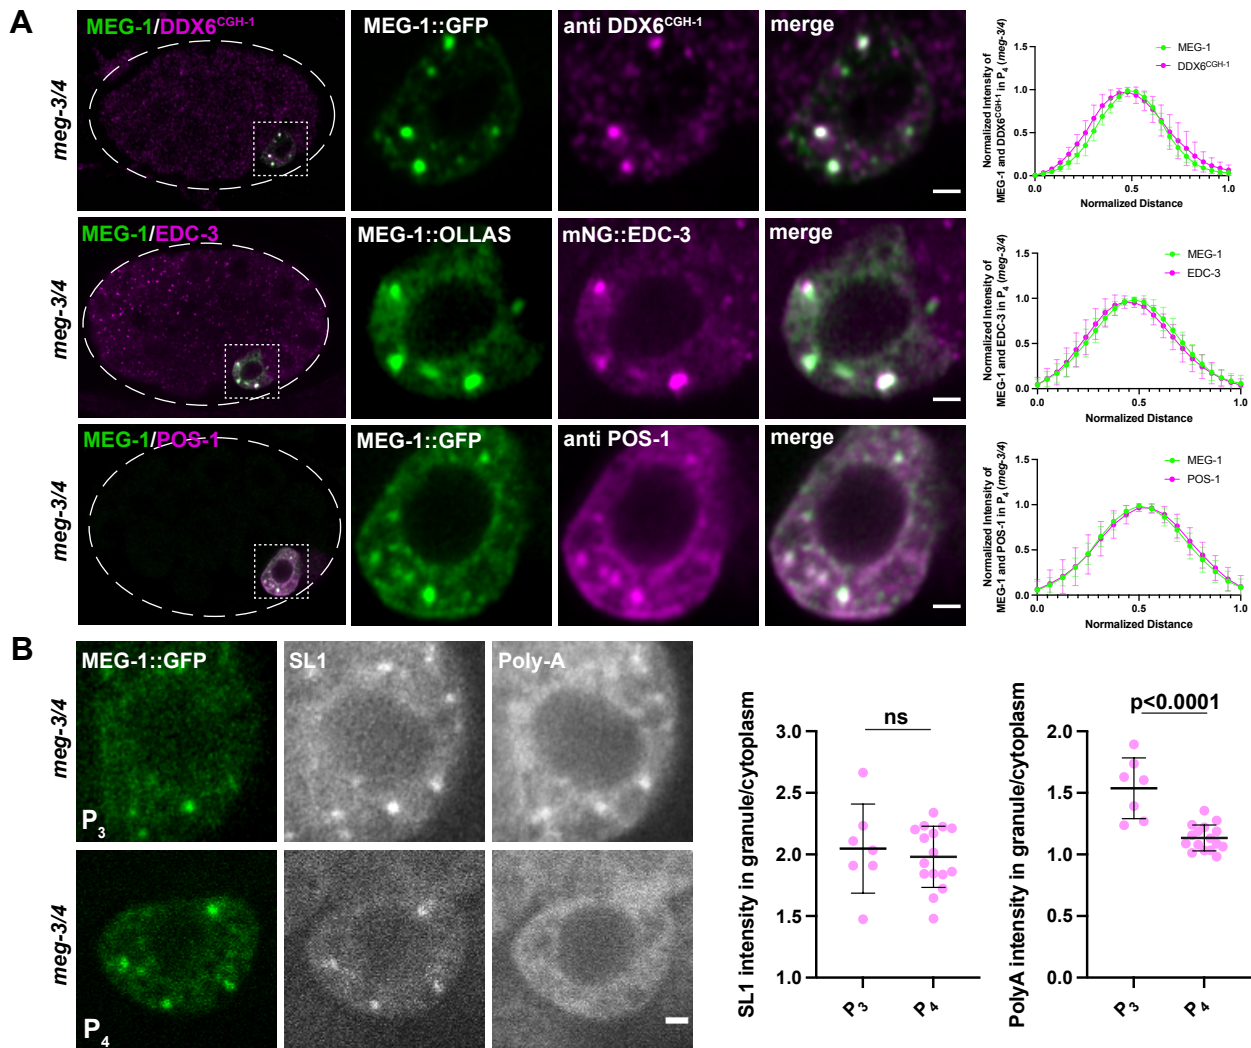

**Fig. 3: MEG-1 puncta in P<sub>4</sub> correspond to germline P-bodies.**

(A) Airyscan photomicrographs of *meg-3 meg-4* embryos expressing MEG-1::GFP and co-stained for GFP and DDX6<sup>CGH-1</sup>, expressing MEG-1::OLLAS and mNG::3xFLAG::EDC-3 and co-stained for OLLAS and FLAG, and expressing MEG-1::GFP and co-stained for GFP and POS-1. Inset shows P<sub>4</sub> blastomere. Graphs plotting the mean intensities through the center of a granule indicate colocalization. For MEG-1 and DDX6<sup>CGH-1</sup> n= 7 granules from 2 embryos, for MEG-1 and EDC-3 n=9 granules from 2 embryos, for MEG-1 and POS-1 n=10 granules from 2 embryos. (B) Photomicrographs of *meg-3 meg-4* embryos expressing MEG-1::GFP and probed for SL1 and poly-A. MEG-1 foci enrich SL1 to similar levels in P<sub>3</sub> and P<sub>4</sub>, but show higher enrichment of poly-A in P<sub>3</sub> compared to P<sub>4</sub>. The ratio of SL1 or poly-A intensity in MEG-1 granules over cytoplasm in P<sub>3</sub> (n=7) was compared to P<sub>4</sub> (n=16). Significance calculated by *t*-test. Quantification for each genotype is from one experiment where several mutant and control animals were processed in parallel. All error bars represent mean ± s.d. All scale bars are 1 μm.



**A**

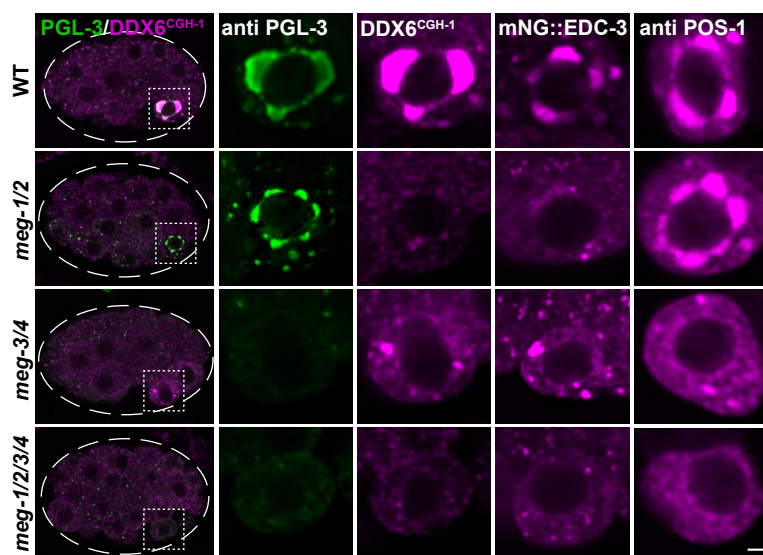

**B**

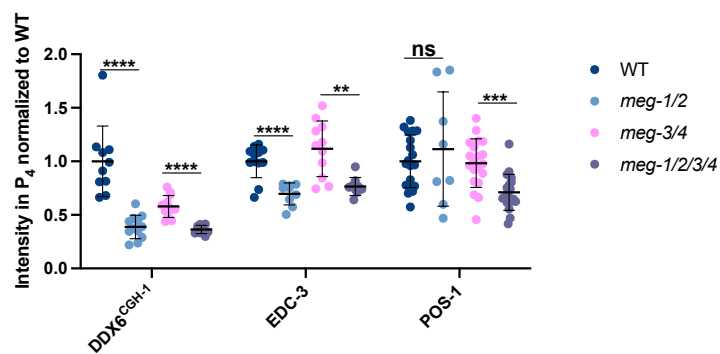

**C**

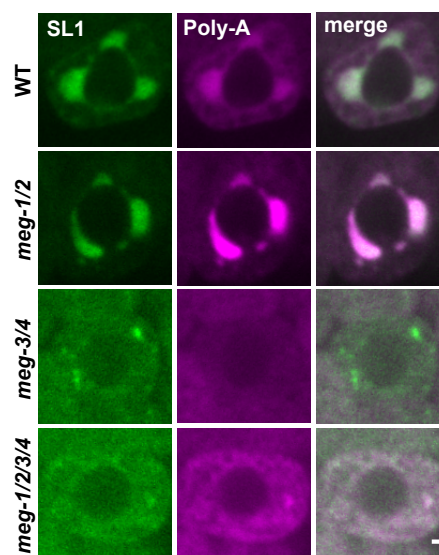

**D**

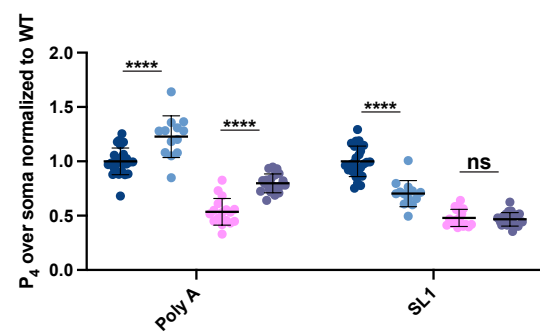



**Fig. 4: MEG-1/2 are required for maintenance of germline P<sub>4</sub>.**

(A) Airyscan photomicrographs of embryos of the indicated *meg* genotypes co-stained for PGL-3 and DDX6<sup>CGH-1</sup> (whole embryo and P<sub>4</sub> inset), or expressing mNG::3xFLAG::EDC-3 and stained for FLAG, or stained for POS-1. *meg-1 meg-2* are not essential for localization of PGL-3 or POS-1 to P<sub>4</sub> but are required for maintenance of DDX6<sup>CGH-1</sup> and EDC-3. (B) Intensity of DDX6<sup>CGH-1</sup>, EDC-3 and POS-1 in P<sub>4</sub> relative to wild type. Quantification of DDX6<sup>CGH-1</sup> for each genotype is from one experiment where mutant and control animals were processed in parallel. Wild type n=10; *meg-1/2* n=12; *meg-3/4* n=12; *meg-1/2/3/4* n=10. Quantification of EDC-3 for each genotype is from one experiment where mutant and control animals were processed in parallel. Wild type n=12; *meg-1/2* n=9; *meg-3/4* n=11; *meg-1/2/3/4* n=9. Quantification of POS-1 for *meg-1 meg-2* embryos is from one experiment and from *meg-3 meg-4* and *meg-1 meg-2 meg-3 meg-4* are from two experiments where mutant and control animals were processed in parallel. Wild type n=19; *meg-1/2* n=8; *meg-3/4* n=20; *meg-1/2/3/4* n=19. (C) Photomicrographs of P<sub>4</sub> in the indicated genotypes probed for SL1 and poly-A. Poly-A levels are increased in *meg-1 meg-2* mutants, despite SL1 levels decreasing or not changing. (D) Quantification of poly-A and SL1 in P<sub>4</sub> over soma normalized to wild type. Quantification for *meg-1 meg-2* embryos are from two experiments and from *meg-3 meg-4* and *meg-1 meg-2 meg-3 meg-4* are from three experiments where mutant and control animals were processed in parallel. Wild type n=26; *meg-1/2* n=13; *meg-3/4* n=17; *meg-1/2/3/4* n=20. All error bars represent mean ± s.d. \*\*\*\**P*≤0.0001; \*\*\**P*≤0.001; \*\**P*≤0.01; ns= not significant (*t*-test). All scale bars are 1 μm.

**A**

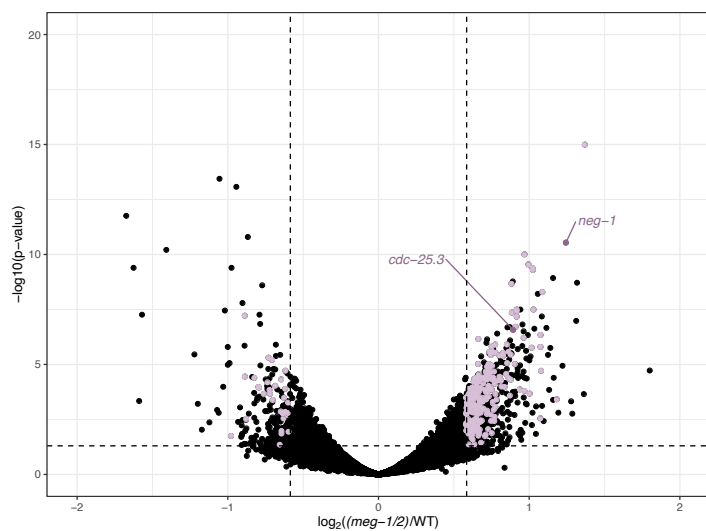

**B**

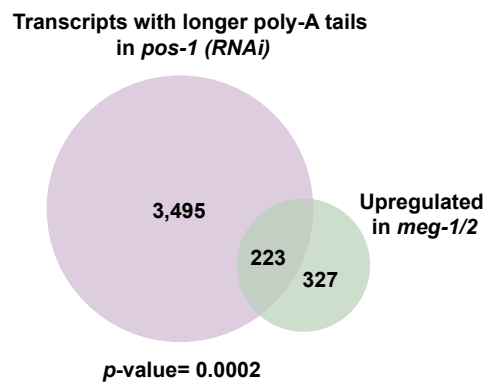

**C**

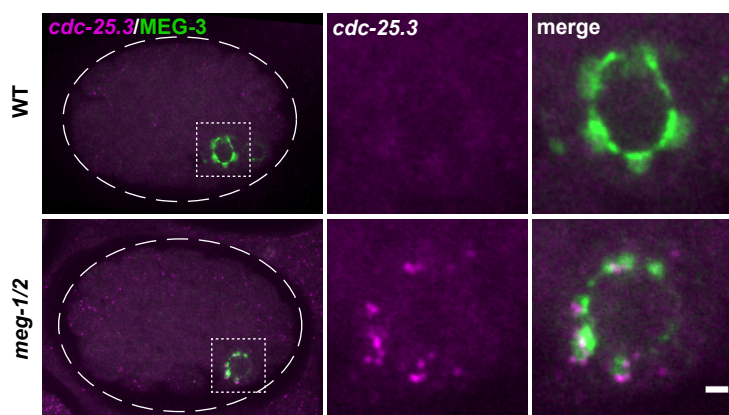

**D**

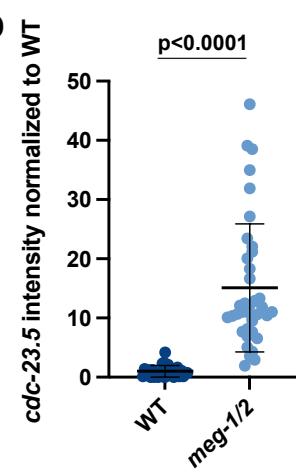

**E**

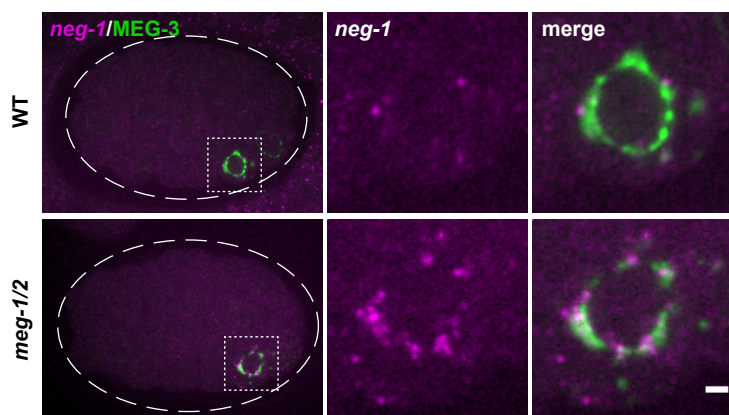

**F**

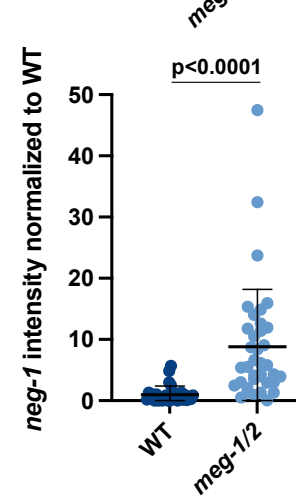

**Fig. 5: *meg-1/2* are required for the turnover of a subset of POS-1 targets.**

(A) RNA-seq from two independent experiments comparing *meg-1 meg-2* (RNAi) and wild-type embryos identified 230 downregulated and 550 upregulated genes ( $\pm 1.5$  fold change). Purple dots correspond to genes significantly down/upregulated in *meg-1 meg-2* embryos that also exhibited longer poly-A tails in *pos-1(RNAi)* embryos (Elewa et al., 2015). (B) 223 genes upregulated in *meg-1 meg-2* embryos overlap with genes whose poly-A tails were extended in *pos-1(RNAi)* embryos  $P=0.0002$  (Fisher's exact test, see methods). (C) and (E) Photomicrographs of *cdc-25.3* and *neg-1* smFISH in embryos expressing the P granule marker MEG-3::GFP. Inset shows  $P_4$ . *cdc-25.3* and *neg-1* are turned over less efficiently in *meg-1 meg-2*  $P_4$  blastomeres. Scale bars are 1  $\mu\text{m}$ . (D) and (F) Intensity of *cdc-25.3* and *neg-1* in  $P_4$  normalized to wild type. *In situ*s for *cdc-25.3* and *neg-1* were done in the same embryos in two independent experiments where mutant and control animals were processed in parallel. Wild type  $n=29$ ; *meg-1/2*  $n=38$ . Error bars represent mean  $\pm$  s.d. A *t*-test was used to make comparisons between genotypes.

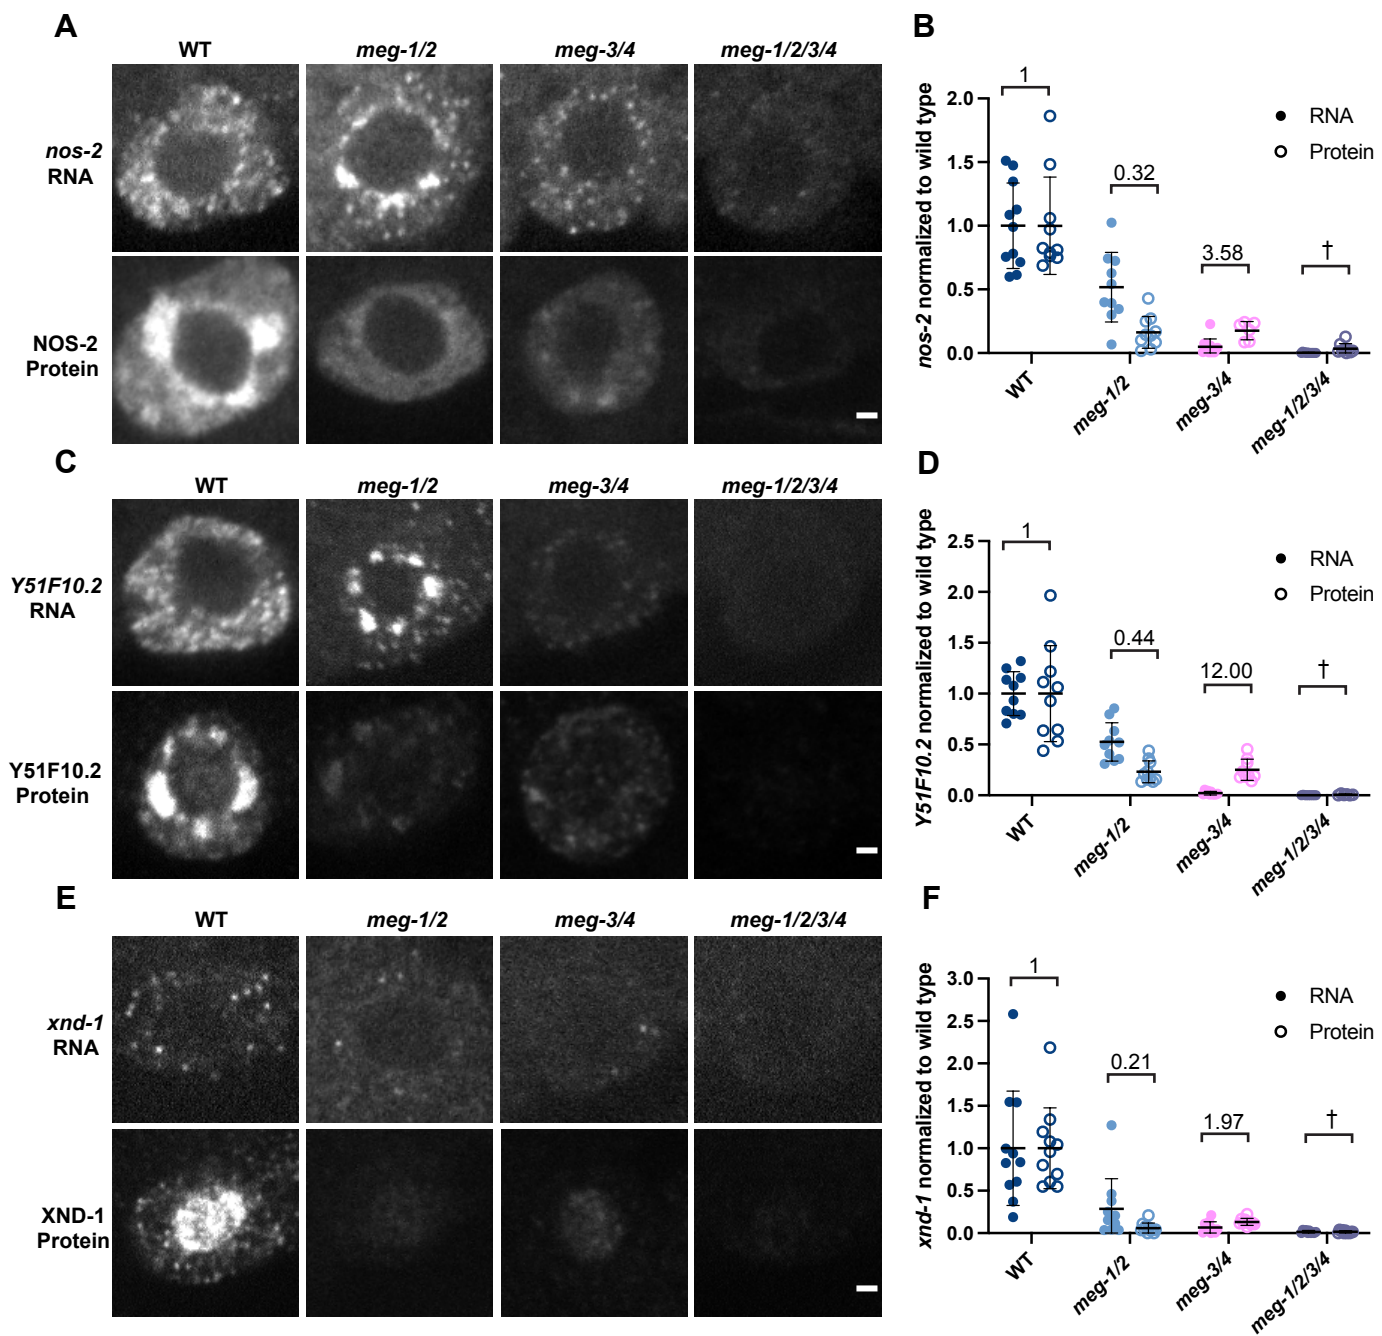

**Fig. 6: *meg-1/2* are required for efficient translation of maternal mRNAs coding for germ cell fate determinants.**

(A), (C) and (E) Photomicrographs of P<sub>4</sub> in embryos of the indicated genotypes comparing *nos-2*, *Y51F10.2*, and *xnd-1* RNA and protein levels. In all cases, the RNA is partially reduced in *meg-1 meg-2* mutants, and dramatically reduced in *meg-3 meg-4* and *meg-1 meg-2 meg-3 meg-4*. In contrast, the protein levels of *meg-1 meg-2* and *meg-3 meg-4* are similar. Scale bars are 1  $\mu$ m. (B), (D) and (F) Intensity of RNA and protein, normalized to wild type. The ratio of protein to RNA levels in each genotype is indicated. In *meg-1 meg-2*, the ratio is decreased, while in *meg-3 meg-4* it is increased. † Due to the very low levels of RNA present in *meg-1 meg-2 meg-3 meg-4* embryos we were unable to calculate the protein/RNA ratio. Quantification for each genotype is from one experiment where mutant and control animals were processed in parallel. For *nos-2* RNA: wild type n=11, *meg-1/2* n=10, *meg-3/4* n=12, *meg-1/2/3/4* n=12. For NOS-2 protein: wild type n=10, *meg-1/2* n=10, *meg-3/4* n=6, *meg-1/2/3/4* n=9. For *Y51F10.2* RNA: wild type n=10, *meg-1/2* n=10, *meg-3/4* n=10, *meg-1/2/3/4* n=9. For *Y51F10.2* protein: wild type n=10, *meg-1/2* n=10, *meg-3/4* n=9, *meg-1/2/3/4* n=6. For *xnd-1* RNA: wild type n=11, *meg-1/2* n=11, *meg-3/4* n=10, *meg-1/2/3/4* n=10. For XND-1 protein: wild type n=11, *meg-1/2* n=11, *meg-3/4* n=10, *meg-1/2/3/4* n=11. Error bars represent mean  $\pm$  s.d.



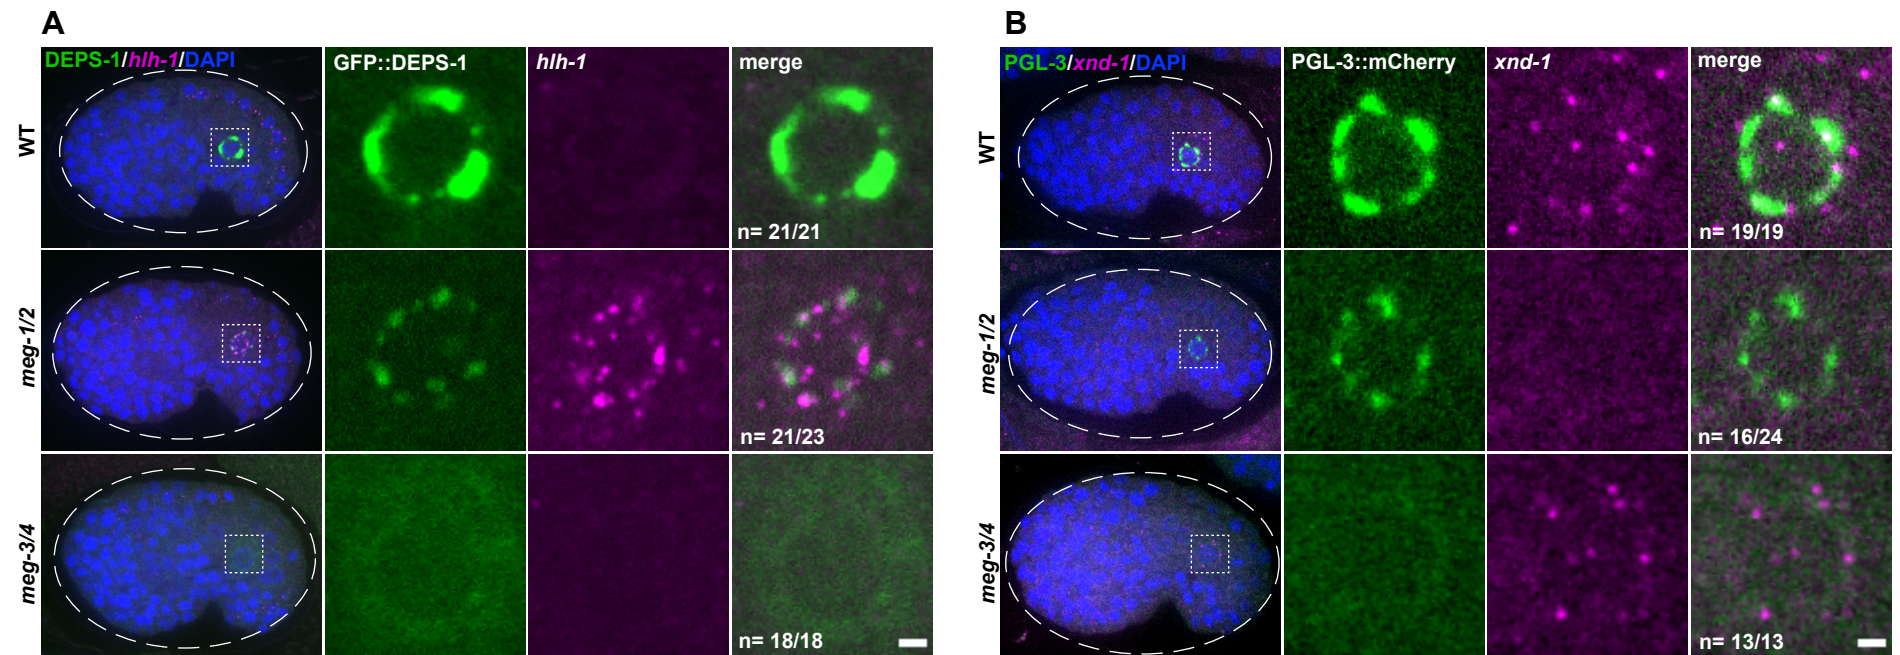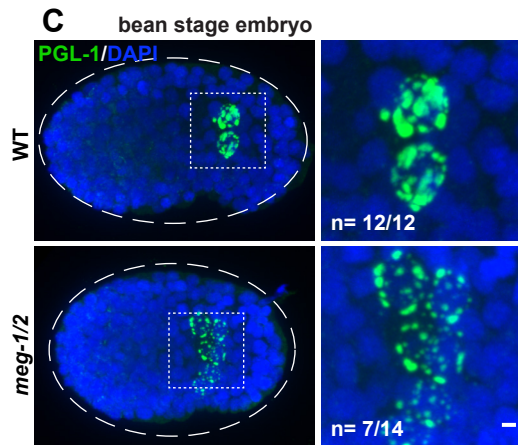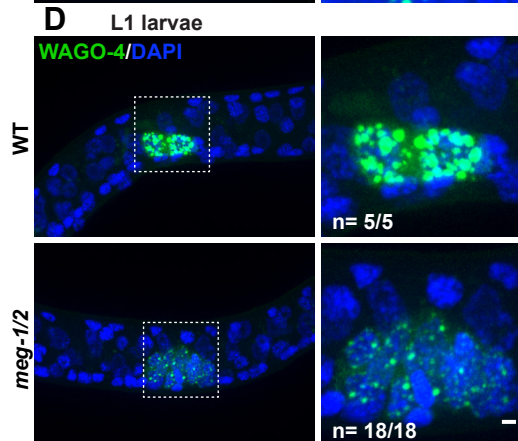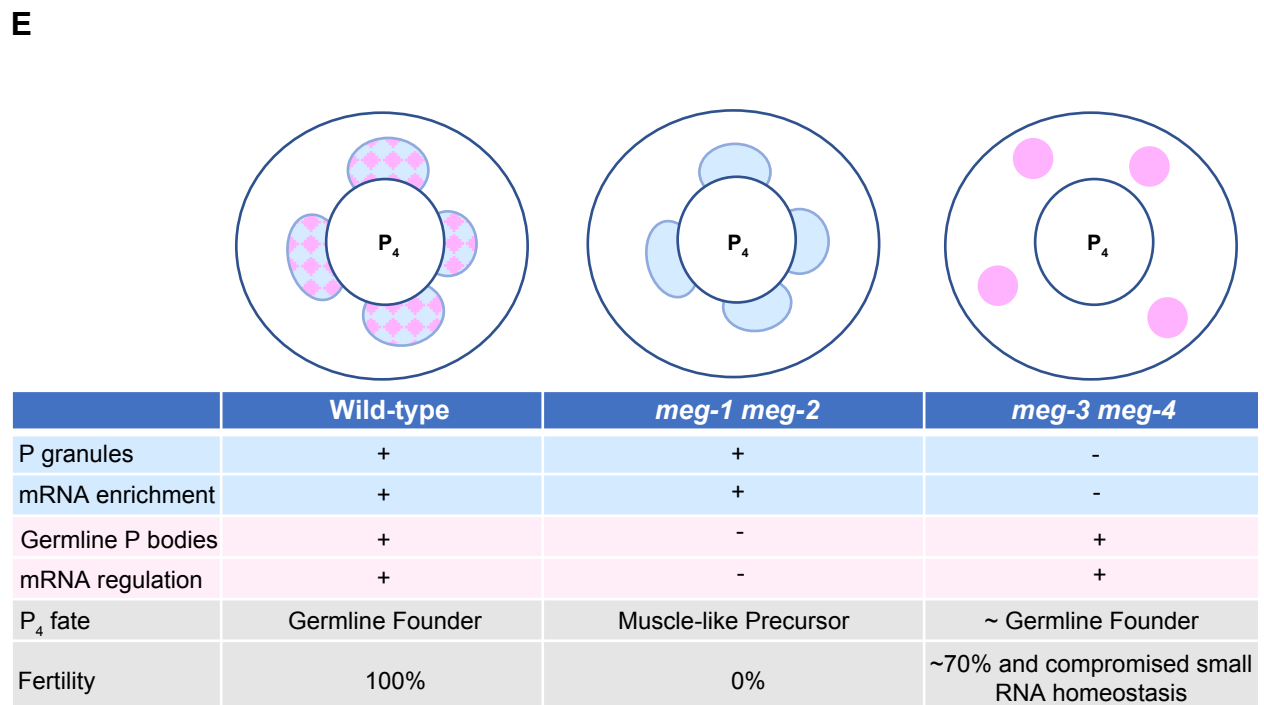

**Fig.7: Primordial germ cells exhibit somatic-like characteristics in *meg-1 meg-2* mutants.**

(A) Photomicrographs of bean stage embryos of the indicated genotypes expressing DEPS-1::GFP and probed for *hlh-1* RNA. Inset depicts a primordial germ cell. Embryos were scored from one independent experiment where mutant and control animals were processed in parallel. 21/21 wild-type and 18/18 *meg-3 meg-4* bean to comma stage embryos did not express *hlh-1*. 21/23 *meg-1 meg-2* did express *hlh-1*. (B) Photomicrographs of bean stage embryos of the indicated genotypes expressing PGL-3::mCherry and probed for *xnd-1* RNA (which is transcribed in PGCs at this stage). Inset depicts a primordial germ cell. Embryos were scored from two independent experiments for *meg-1 meg-2* and one experiment for *meg-3 meg-4* where mutant and control animals were processed in parallel. 19/19 wild-type and 13/13 *meg-3 meg-4* bean stage embryos expressed *xnd-1*. 16/24 *meg-1 meg-2* embryos did not express *xnd-1*. (C) Maximum projections of bean stage embryos of the indicated genotypes stained for PGL-1. Inset shows the primordial germ cells. Embryos were scored from one experiment where mutant and control animals were processed in parallel. 12/12 wild-type embryos had two PGL-1 positive cells and 7/14 *meg-1 meg-2* embryos had more than two PGL-1 positive cells. (D) Maximum projections of germ cells from unfed L1 larvae expressing the germ granule marker 3xFLAG::GFP::WAGO-4. Embryos were scored from one experiment where mutant and control animals were processed in parallel. 5/5 wild-type embryos had two WAGO-4 positive cells and 18/18 *meg-1 meg-2* embryos had more than two WAGO-4 positive cells. All scale bars are 1  $\mu$ m. (E) Working model: Cartoon and table summarizing P<sub>4</sub> phenotypes based on this study and on Wang et al., 2014 and Ouyang et al., 2019. P granules are depicted in blue, germline P-body in pink, and their merge in a checkered pattern. Note that P granule and germline P-body proteins also exist in a more dilute state in the cytoplasm. See text for additional details.
